# Supplementary material for: Transcriptome-wide association study of Alzheimer disease reveals many differentially expressed genes and multiple biological pathways in brain tissue from African American donors
Source: bioRxiv or medRxiv preprint supplement (doi:10.1101/2024.10.29.24316311), 2024-11-04
Supplement: Supplementary file [file media-1.pdf]

**Supplementary Materials for “A gene expression study of Alzheimer’s disease in post-mortem tissue from African American donors.” by M.W. Logue et al.**

**Supplementary Figure 1:** Boxplot of the 6 most significant differentially expressed genes.

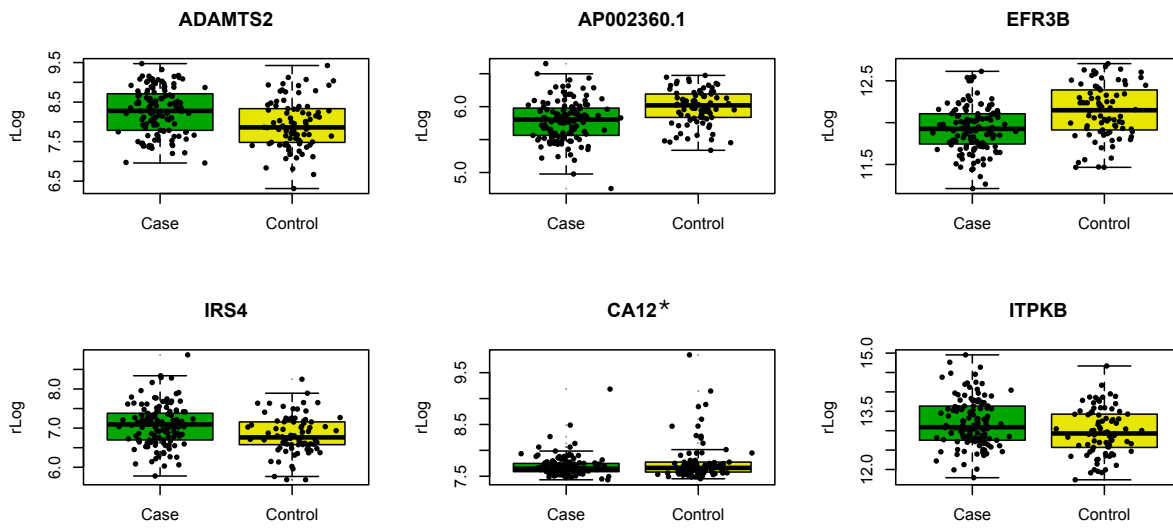

\* Excludes an outlier with high expression in controls to preserve detail.

**Supplementary Figure 2:** Correlation of effect sizes from the sensitivity analyses for adjustment for PMI, and B) the exclusion of young (age <60) donors from the analyses. The effect sizes  $-\log_{10}$  P-values were highly correlated for the PMI sensitivity analysis (A and B) and for the age sensitivity analysis (C and D). The correlations were all very high for the effect sizes and  $\log_{10}$  P-values ( $r > 0.90$ ).

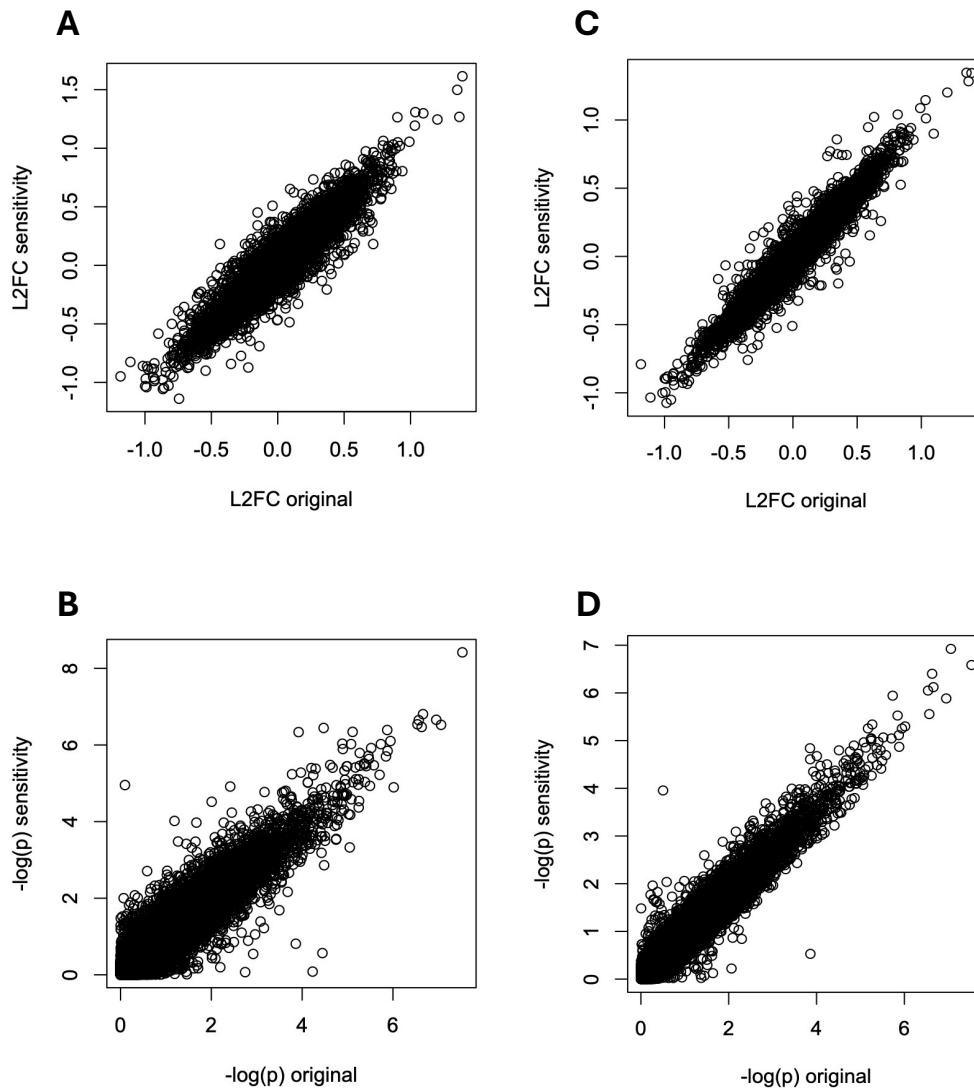

**Supplementary Table 1: SEE ATTACHMENT.** Table of the 482 transcriptome-wide significant associations between gene expression and AD case status.

**Supplementary Table 2:** Results of sensitivity analyses examining the impact of PMI and excluding controls with age at death < 60 for the top 20 differentially expressed genes.

| Gene       | PMI Sensitivity Analysis |          |         | Age Sensitivity Analysis |          |        |
|------------|--------------------------|----------|---------|--------------------------|----------|--------|
|            | L2FC                     | P        | Padj    | L2FC                     | P        | Padj   |
| ADAMTS2    | 0.65                     | 3.81E-09 | 0.00013 | 0.56                     | 2.60E-07 | 0.0044 |
| AP002360.1 | -0.37                    | 2.98E-07 | 0.0014  | -0.36                    | 1.19E-07 | 0.0040 |
| EFR3B      | -0.26                    | 2.20E-07 | 0.0014  | -0.24                    | 1.31E-06 | 0.0063 |
| IRS4       | 0.51                     | 1.57E-07 | 0.0014  | 0.46                     | 7.57E-07 | 0.0060 |
| CA12       | -0.83                    | 3.40E-07 | 0.0014  | -0.79                    | 3.96E-07 | 0.0044 |
| ITPKB      | 0.34                     | 2.25E-07 | 0.0014  | 0.29                     | 2.78E-06 | 0.011  |
| PDE10A     | -0.50                    | 2.89E-07 | 0.0014  | -0.46                    | 8.91E-07 | 0.0060 |
| TDRKH      | -0.16                    | 1.27E-05 | 0.0079  | -0.16                    | 5.02E-06 | 0.014  |
| LINC01182  | -0.71                    | 7.89E-07 | 0.0021  | -0.63                    | 5.57E-06 | 0.014  |
| TFCP2      | -0.17                    | 1.43E-06 | 0.0027  | -0.15                    | 1.35E-05 | 0.019  |
| AL158071.3 | 0.58                     | 4.07E-07 | 0.0014  | 0.49                     | 7.68E-06 | 0.017  |
| EHHADH     | -0.32                    | 1.99E-06 | 0.0032  | -0.30                    | 2.98E-06 | 0.011  |
| PIEZO2     | 0.45                     | 9.49E-07 | 0.0021  | 0.42                     | 1.14E-06 | 0.0063 |
| P2RY1      | -0.44                    | 6.02E-06 | 0.0053  | -0.41                    | 9.00E-06 | 0.017  |
| AC018647.2 | -0.26                    | 3.39E-06 | 0.0040  | -0.23                    | 2.02E-05 | 0.021  |
| NOX4       | -0.45                    | 1.20E-06 | 0.0025  | -0.41                    | 8.57E-06 | 0.017  |
| ECHS1      | -0.17                    | 1.17E-05 | 0.0077  | -0.16                    | 2.67E-05 | 0.022  |
| ZCCHC14    | 0.15                     | 2.32E-06 | 0.0035  | 0.12                     | 3.88E-05 | 0.025  |
| LINC01094  | 0.46                     | 1.92E-06 | 0.0032  | 0.40                     | 1.59E-05 | 0.019  |
| AP001180.1 | 1.50                     | 3.58E-06 | 0.0040  | 1.35                     | 1.06E-05 | 0.017  |

**Supplementary Table 3:** Tests for differential gene expression of genome-wide significant loci from AD GWAS in EA (Bellenguez et al. 2022) and AA (Sherva et al. 2023) cohorts, and other genes implicated in prior AA GWAS or candidate gene association studies (Logue et al. 2023). False discovery rate multiple testing corrections performed sequentially within each category.

| EA AD GWAS |        |       |                  |          |        |       |                  | AA AD GWAS |        |       |                  |
|------------|--------|-------|------------------|----------|--------|-------|------------------|------------|--------|-------|------------------|
| Gene       | L2FC   | P     | p <sub>adj</sub> | Gene     | L2FC   | P     | p <sub>adj</sub> | Gene       | L2FC   | P     | p <sub>adj</sub> |
| WNT3       | 0.16   | 0.052 | 0.0017           | DOC2A    | 0.048  | 0.068 | 0.48             | KIF17      | -0.17  | 0.021 | 0.17             |
| ICA1       | -0.17  | 0.068 | 0.010            | IL34     | 0.061  | 0.091 | 0.50             | SH2D5      | -0.16  | 0.035 | 0.17             |
| PLEKHA1    | 0.11   | 0.041 | 0.010            | ADAMTS1  | 0.072  | 0.11  | 0.51             | DCBLD1     | -0.093 | 0.043 | 0.17             |
| FERMT2     | -0.11  | 0.045 | 0.011            | BIN1     | -0.029 | 0.045 | 0.52             | POLR2E     | -0.086 | 0.052 | 0.17             |
| APOE       | -0.20  | 0.079 | 0.012            | CR1      | 0.086  | 0.14  | 0.53             | NUS1       | 0.060  | 0.16  | 0.42             |
| SORL1      | -0.10  | 0.042 | 0.014            | SIGLEC11 | 0.095  | 0.16  | 0.54             | EIF4G3     | -0.028 | 0.27  | 0.53             |
| PRDM7      | 0.55   | 0.232 | 0.017            | FOXF1    | -0.061 | 0.10  | 0.55             | TREML1     | -0.15  | 0.29  | 0.53             |
| SNX1       | -0.069 | 0.029 | 0.017            | SLC24A4  | 0.037  | 0.061 | 0.55             | GOPC       | -0.038 | 0.33  | 0.54             |
| SLC2A4RG   | -0.15  | 0.063 | 0.019            | RHOH     | 0.11   | 0.19  | 0.55             | ARHGAP45   | 0.035  | 0.63  | 0.91             |
| CLNK       | 0.68   | 0.30  | 0.022            | JAZF1    | -0.024 | 0.040 | 0.56             | TMCO4      | -0.017 | 0.82  | 0.97             |
| HS3ST5     | -0.14  | 0.068 | 0.036            | CD2AP    | 0.022  | 0.039 | 0.57             | CDA        | -0.029 | 0.85  | 0.97             |
| COX7C      | -0.10  | 0.052 | 0.047            | WDR81    | -0.029 | 0.052 | 0.57             | CNN2       | -0.009 | 0.93  | 0.97             |
| TSPOAP1    | -0.11  | 0.054 | 0.050            | TMEM106B | -0.030 | 0.054 | 0.58             | ROS1       | 0.005  | 0.97  | 0.97             |
| TPCN1      | -0.11  | 0.059 | 0.066            | GRN      | -0.034 | 0.061 | 0.58             | ANTXR2     | 0.13   | 0.021 | 0.24             |
| CTSB       | -0.066 | 0.036 | 0.067            | CASS4    | 0.055  | 0.11  | 0.60             | GRIN3B     | -0.34  | 0.078 | 0.32             |
| BCKDK      | -0.083 | 0.046 | 0.069            | LILRB2   | -0.076 | 0.15  | 0.61             | EML6       | -0.069 | 0.087 | 0.32             |
| TREM2      | 0.21   | 0.12  | 0.074            | CLU      | 0.023  | 0.044 | 0.61             | EFHB       | -0.27  | 0.18  | 0.47             |
| SORT1      | 0.064  | 0.036 | 0.075            | SPI1     | -0.038 | 0.075 | 0.61             | TRPS1      | -0.042 | 0.21  | 0.47             |
| RBCK1      | -0.089 | 0.051 | 0.080            | EPDR1    | -0.033 | 0.067 | 0.63             | FHOD3      | 0.037  | 0.35  | 0.65             |
| TSPAN14    | 0.079  | 0.046 | 0.08             | ABCA7    | 0.038  | 0.080 | 0.63             | ROBO1      | -0.026 | 0.46  | 0.68             |
| MS4A4A     | 0.20   | 0.14  | 0.14             | ACE      | -0.040 | 0.086 | 0.64             | AL355353.1 | -0.27  | 0.49  | 0.68             |
| MAF        | 0.089  | 0.062 | 0.15             | HLA-DQA1 | 0.075  | 0.19  | 0.69             | ITGA11     | 0.022  | 0.75  | 0.90             |
| SPDYE3     | 0.091  | 0.065 | 0.16             | ABI3     | 0.036  | 0.093 | 0.70             | KCNH8      | -0.019 | 0.83  | 0.90             |
| PRKD3      | 0.043  | 0.031 | 0.18             | KLF16    | 0.024  | 0.063 | 0.70             | EGFLAM     | -0.020 | 0.90  | 0.90             |
| APH1B      | -0.055 | 0.041 | 0.18             | PLCG2    | 0.024  | 0.067 | 0.72             |            |        |       |                  |
| BLNK       | -0.11  | 0.086 | 0.19             | EED      | -0.011 | 0.036 | 0.75             |            |        |       |                  |

|                 |        |       |      |         |         |       |      |                                     |        |        |       |
|-----------------|--------|-------|------|---------|---------|-------|------|-------------------------------------|--------|--------|-------|
| <b>ABCA1</b>    | 0.083  | 0.063 | 0.19 | TREML2  | -0.072  | 0.23  | 0.76 | <b>Other AA AD Genetics Studies</b> |        |        |       |
| <b>INPP5D</b>   | 0.082  | 0.072 | 0.25 | MINDY2  | -0.013  | 0.041 | 0.76 | <b>IGF1R</b>                        | 0.11   | 0.0013 | 0.019 |
| <b>RASGEF1C</b> | -0.092 | 0.080 | 0.25 | SPPL2A  | 0.013   | 0.043 | 0.76 | <b>COBL</b>                         | 0.079  | 0.083  | 0.31  |
| <b>PTK2B</b>    | -0.058 | 0.051 | 0.26 | TNIP1   | 0.011   | 0.038 | 0.77 | <b>AKAP9</b>                        | 0.070  | 0.083  | 0.31  |
| <b>SEC61G</b>   | -0.059 | 0.056 | 0.29 | SHARPIN | -0.014  | 0.054 | 0.79 | <b>PON2</b>                         | -0.075 | 0.11   | 0.31  |
| <b>APP</b>      | -0.030 | 0.031 | 0.34 | CTSH    | 0.013   | 0.055 | 0.81 | <b>NOS3</b>                         | -0.17  | 0.11   | 0.31  |
| <b>UNC5CL</b>   | -0.093 | 0.10  | 0.35 | EPHA1   | 0.026   | 0.15  | 0.86 | <b>PSEN1</b>                        | -0.044 | 0.12   | 0.31  |
| <b>MYO15A</b>   | 0.067  | 0.071 | 0.35 | ADAM17  | -0.0053 | 0.031 | 0.87 | <b>PSEN2</b>                        | -0.056 | 0.18   | 0.34  |
| <b>ANKH</b>     | 0.023  | 0.027 | 0.40 | SCIMP   | -0.0073 | 0.062 | 0.91 | <b>PICALM</b>                       | -0.052 | 0.18   | 0.34  |
| <b>NCK2</b>     | 0.031  | 0.038 | 0.41 | IDUA    | -0.0058 | 0.069 | 0.93 | <b>SORCS1</b>                       | -0.072 | 0.25   | 0.41  |
| <b>ANK3</b>     | -0.022 | 0.028 | 0.44 | MME     | -0.026  | 0.43  | 0.95 | <b>SYNPR</b>                        | 0.068  | 0.54   | 0.80  |
| <b>USP6NL</b>   | -0.027 | 0.036 | 0.45 | WDR12   | -       | 0.036 | 0.99 | <b>SELP</b>                         | 0.091  | 0.65   | 0.81  |
| <b>UMAD1</b>    | -0.032 | 0.043 | 0.46 |         |         |       |      | <b>ARRDC4</b>                       | -0.040 | 0.69   | 0.81  |
|                 |        |       |      |         |         |       |      | <b>F5</b>                           | -0.039 | 0.71   | 0.81  |
|                 |        |       |      |         |         |       |      | <b>TTR</b>                          | -0.094 | 0.90   | 0.94  |
|                 |        |       |      |         |         |       |      | <b>DIO2</b>                         | -0.24  | 0.94   | 0.94  |

**Supplementary Table 4:** GOseq analysis of the differentially expressed genes and of the members of the WGCNA networks. Members of the GO category or network that are differentially expressed at the  $p < 0.05$  level are labeled + and - to indicate the direction of effect, while ++ and -- indicate that the gene is associated at the transcriptome-wide ( $p_{adj} < 0.05$ ) level. The top 10 enriched categories are listed for gene sets with significant enrichments. For gene categories with no corrected significant GO terms, the top 5 GO terms are listed.

| network  | ontology | category   | term                                           | Num DE in category | Num in category | p        | padj     | genes                                                                                                                                                                                                                                                                                                                                                                                                                                                                                                                                                                                                                                                                                                                            |
|----------|----------|------------|------------------------------------------------|--------------------|-----------------|----------|----------|----------------------------------------------------------------------------------------------------------------------------------------------------------------------------------------------------------------------------------------------------------------------------------------------------------------------------------------------------------------------------------------------------------------------------------------------------------------------------------------------------------------------------------------------------------------------------------------------------------------------------------------------------------------------------------------------------------------------------------|
| DE Genes | BP       | GO:0055114 | oxidation-reduction process                    | 55                 | 927             | 6.38E-11 | 3.07E-07 | ABCD2--,ACAA2--,ADHFE1--,ADIPOR1--,ALDH7A1--,ALDH9A1--,BCKDHB--,BPGM--,CCS--,COX15--,COX4I1--,COX6B1--,CPT2--,CYP2J2--,DDO--,DECR1--,DHFR2--,ECHS1--,EGLN3--,EHHADH--,ETF A--,ETFB--,F8--,FAXDC2--,FDX2--,GLUD1--,HADHA--,HSD11B2++,HSD17B7++,IDH2--,IRS2++,MSRB1--,NDUFA1--,NDUFA2--,NDUFA3--,NDUFA6--,NDUFA7--,NDUFB1--,NDUFB2--,NDUFB3--,NDUFB8--,NDUFS3--,NDUFS5--,NOX4--,PANK2++,PFKP++,PLA2G7--,PRDX2--,PRDX5--,STEAP3++,STEAP4++,TM7SF2--,TXN2--,TXNDC12--,UQCRC2--                                                                                                                                                                                                                                                       |
|          | BP       | GO:0044281 | small molecule metabolic process               | 86                 | 1945            | 7.72E-11 | 3.07E-07 | ABCC2++,ABCD2--,ACAA2--,ADA2--,ADAL--,ADHFE1--,ADIPOR1--,AGPAT1--,AIG1--,ALDH7A1--,ARV1--,ATP5F1B--,ATP5F1C--,ATP5MF--,ATP5MG--,ATP5PB--,BCKDHB--,BPGM--,CD244--,CHST6++,COQ5--,COX15--,COX4I1--,COX6B1--,CPT2--,CYP2J2--,DDO--,DECR1--,DHFR2--,ECHS1--,EGLN3--,EHHADH--,ENOPH1--,ERG28--,ETF A--,ETFB--,FDX2--,GLUD1--,HADHA--,HDAC4++,HDCC3--,HKDC1--,HSD17B7++,IDH2--,IRS2++,ITPKB++,LARS2--,LCLAT1--,MCCC2--,MPC1--,NDST3--,NDUFA1--,NDUFA2--,NDUFA3--,NDUFA6--,NDUFA7--,NDUFB1--,NDUFB2--,NDUFB3--,NDUFB8--,NDUFS3--,NDUFS5--,NFS1--,NOX4--,NUDT7--,P2RY1--,PANK2++,PDE10A--,PDE7B--,PDZD11--,PFKP++,PLCE1++,PPT1--,PRKAG1--,PRTFDC1--,PSMC3--,PSME3--,RIDA--,SDSL--,SEC13--,SLC7A2++,SRR--,TM7SF2--,TXN2--,UQCRC2--,VCAN++ |
|          | MF       | GO:0016491 | oxidoreductase activity                        | 45                 | 686             | 8.61E-10 | 2.28E-06 | ADHFE1--,ALDH7A1--,ALDH9A1--,BCKDHB--,CCS--,COX15--,COX4I1--,COX6B1--,CYP2J2--,DDO--,DECR1--,DHFR2--,EGLN3--,EHHADH--,ETF A--,ETFB--,F8--,FAXDC2--,FDX2--,GLUD1--,HADHA--,HBA1--,HSD11B2++,HSD17B7++,IDH2--,MSRB1--,NDUFA1--,NDUFA2--,NDUFA3--,NDUFA6--,NDUFA7--,NDUFB1--,NDUFB2--,NDUFB3--,NDUFB8--,NDUFS3--,NDUFS5--,NOX4--,PRDX2--,PRDX5--,STEAP3++,STEAP4++,TM7SF2--,TXN2--,TXNDC12--                                                                                                                                                                                                                                                                                                                                        |
|          | BP       | GO:0072521 | purine-containing compound metabolic process   | 39                 | 565             | 1.64E-09 | 3.26E-06 | ADA2--,ADAL--,ATP5F1B--,ATP5F1C--,ATP5MF--,ATP5MG--,ATP5PB--,BPGM--,COX15--,COX4I1--,COX6B1--,ENOPH1--,HDAC4++,HDCC3--,HKDC1--,MCCC2--,MPC1--,NDUFA1--,NDUFA2--,NDUFA3--,NDUFA6--,NDUFA7--,NDUFB1--,NDUFB2--,NDUFB3--,NDUFB8--,NDUFS3--,NDUFS5--,NFS1--,NUDT7--,PANK2++,PDE10A--,PDE7B--,PFKP++,PPT1--,PRKAG1--,PRTFDC1--,SEC13--,UQCRC2--                                                                                                                                                                                                                                                                                                                                                                                       |
|          | BP       | GO:0006119 | oxidative phosphorylation                      | 20                 | 128             | 3.15E-09 | 5.01E-06 | ATP5F1B--,ATP5F1C--,ATP5MF--,ATP5MG--,ATP5PB--,COX15--,COX4I1--,COX6B1--,NDUFA1--,NDUFA2--,NDUFA3--,NDUFA6--,NDUFA7--,NDUFB1--,NDUFB2--,NDUFB3--,NDUFB8--,NDUFS3--,NDUFS5--,UQCRC2--                                                                                                                                                                                                                                                                                                                                                                                                                                                                                                                                             |
|          | BP       | GO:0006091 | generation of precursor metabolites and energy | 35                 | 485             | 4.68E-09 | 6.19E-06 | ATP5F1B--,ATP5F1C--,ATP5MF--,ATP5MG--,ATP5PB--,BPGM--,COX15--,COX4I1--,COX6B1--,ETF A--,ETFB--,FDX2--,HDAC4++,HKDC1--,IDH2--,IRS2++,NDUFA1--,NDUFA2--,NDUFA3--,NDUFA6--,NDUFA7--,NDUFB1--,NDUFB2--,NDUFB3--,NDUFB8--,NDUFS3--,NDUFS5--,NOX4--,PANK2++,PFKP++,PRKAG1--,SEC13--,STEAP4++,UQCRC2--,VGF--                                                                                                                                                                                                                                                                                                                                                                                                                            |
|          | BP       | GO:0017144 | drug metabolic process                         | 45                 | 771             | 9.53E-09 | 1.08E-05 | ABCC2++,ADA2--,ADAL--,ATP5F1B--,ATP5F1C--,ATP5MF--,ATP5MG--,ATP5PB--,BPGM--,COX15--,COX4I1--,COX6B1--,CYP2J2--,DHFR2--,ENOPH1--,HBA1--,HDAC4++,HKDC1--,IDH2--,MCCC2--,NDUFA1--,NDUFA2--,NDUFA3--,NDUFA6--,NDUFA7--,NDUFB1--,NDUFB2--,NDUFB3--,NDUFB8--,NDUFS3--,NDUFS5--,PDZD11--                                                                                                                                                                                                                                                                                                                                                                                                                                                |

|      |    |            |                                                      |     |      |          |          |                                                                                                                                                                                                                                                                                                                                                                                                                                                                                                                                                                                                                                                                                                                                                                                                                                                                                                                                                                                                                                                                                                                                                                                                                                                                                                                                         |
|------|----|------------|------------------------------------------------------|-----|------|----------|----------|-----------------------------------------------------------------------------------------------------------------------------------------------------------------------------------------------------------------------------------------------------------------------------------------------------------------------------------------------------------------------------------------------------------------------------------------------------------------------------------------------------------------------------------------------------------------------------------------------------------------------------------------------------------------------------------------------------------------------------------------------------------------------------------------------------------------------------------------------------------------------------------------------------------------------------------------------------------------------------------------------------------------------------------------------------------------------------------------------------------------------------------------------------------------------------------------------------------------------------------------------------------------------------------------------------------------------------------------|
|      |    |            |                                                      |     |      |          |          | ,PFKP++,PLA2G7--,PRDX2--,PRDX5--,PRKAG1--,RIDA--,SDSL--,SEC13--,SLC7A2++,SRR--<br>,TGFB2++,UQCRC2--,VCAN++                                                                                                                                                                                                                                                                                                                                                                                                                                                                                                                                                                                                                                                                                                                                                                                                                                                                                                                                                                                                                                                                                                                                                                                                                              |
|      | BP | GO:0046034 | ATP metabolic process                                | 26  | 282  | 1.43E-08 | 1.36E-05 | ATP5F1B--,ATP5F1C--,ATP5MF--,ATP5MG--,ATP5PB--,BPGM--,COX15--,COX41I--<br>,COX6B1--,HDAC4++,HKDC1--,NDUFA1--,NDUFA2--,NDUFA3--,NDUFA6--,NDUFA7--<br>,NDUFB1--,NDUFB2--,NDUFB3--,NDUFB8--,NDUFS3--,NDUFS5--,PFKP++,PRKAG1--<br>,SEC13--,UQCRC2--                                                                                                                                                                                                                                                                                                                                                                                                                                                                                                                                                                                                                                                                                                                                                                                                                                                                                                                                                                                                                                                                                         |
|      | BP | GO:0009150 | purine ribonucleotide metabolic process              | 35  | 506  | 1.54E-08 | 1.36E-05 | ATP5F1B--,ATP5F1C--,ATP5MF--,ATP5MG--,ATP5PB--,BPGM--,COX15--,COX41I--<br>,COX6B1--,HDAC4++,HDCC3--,HKDC1--,MCCC2--,MPC1--,NDUFA1--,NDUFA2--<br>,NDUFA3--,NDUFA6--,NDUFA7--,NDUFB1--,NDUFB2--,NDUFB3--,NDUFB8--,NDUFS3--<br>,NDUFS5--,NFS1--,NUDT7--,PANK2++,PDE10A--,PDE7B--,PFKP++,PPT1--,PRKAG1--<br>,SEC13--,UQCRC2--                                                                                                                                                                                                                                                                                                                                                                                                                                                                                                                                                                                                                                                                                                                                                                                                                                                                                                                                                                                                               |
|      | BP | GO:0009205 | purine ribonucleoside triphosphate metabolic process | 27  | 311  | 2.62E-08 | 1.99E-05 | ATP5F1B--,ATP5F1C--,ATP5MF--,ATP5MG--,ATP5PB--,BPGM--,COX15--,COX41I--<br>,COX6B1--,HDAC4++,HKDC1--,NDUFA1--,NDUFA2--,NDUFA3--,NDUFA6--,NDUFA7--<br>,NDUFB1--,NDUFB2--,NDUFB3--,NDUFB8--,NDUFS3--,NDUFS5--,NFS1--<br>,PFKP++,PRKAG1--,SEC13--,UQCRC2--                                                                                                                                                                                                                                                                                                                                                                                                                                                                                                                                                                                                                                                                                                                                                                                                                                                                                                                                                                                                                                                                                  |
| blue | MF | GO:0003676 | nucleic acid binding                                 | 800 | 3378 | 9.33E-39 | 6.85E-35 | AHCTF1+,AIMP1-,ATF6-,ATR-,ATRX+,BLM+,BLZF1-,CAPRIN1-,CDK13+,CHD1+,CLNS1A-<br>,CLOCK+,CPSF3-,CREBRF+,CRLF3+,DCAF13-,DDX50-,DEK+,DNAJC2+,EIF2A-,EIF2B1-<br>,EIF2S1-,EIF2S3-,EIF3M-,EIF4E-,EPRS1-,ERH-,ETV1-,FASTKD3-,FIP1L1-<br>,FOXO3+,G3BP1+,GDI2-,GFM1-,GNL2-,GTF2B-,GTF2H5-,H4C3-,HMGN1-<br>,LCOR++,LCORL+,LIG4-,LIN9+,LSM3-,MAGOH-,MAK16-,MBD2+,MEIS2-,MFAP1-<br>,MIER3+,MLF1-,MORC3+,MRPL13-,MRPS18C-,MRPS28-,MRPS35-,MRPS9--<br>,NFAT5+,NFE2L3+,NUDT4+,NUP42-,ORC3-,OTUD4+,PA2G4-,PDIA3-,PIN4-,POLI-<br>,POLR2K--,POU5F2+,PRKDC-,PRMT3-<br>,PRPF38B+,PRPF40A+,PRPF4B+,PURB+,PUS7+,RBBP6+,RBM48+,RBMXL1-<br>,RC3H2+,REL+,RORA+,RPF1-,SAP18-,SETDB2+,SF3B6-,SIRT1+,SLIRP-<br>,SMAD4+,SMARCA1++,SNRPD1-,SNRPE-,SNW1-,SREK1+,SRP19+,SRP54-,SRP9-<br>,SRSF10+,SUCLG1-,SUPT3H-,TBCA-,TDRD3-,TENT4B+,THOC2+,THOC7-,TIPIN-<br>,TOPORS+,TSN-,TUT4+,WDHD1--,YWHAE-,YY1+,ZBTB1+,ZBTB44+,ZC3H13-,ZCCHC7-<br>,ZCCHC8+,ZCCHC9-,ZFC3H1+,ZFP3-,ZMYM4-,ZNF141+,ZNF264+,ZNF280C-<br>,ZNF292+,ZNF345+,ZNF383+,ZNF431+,ZNF441-,ZNF442-,ZNF484+,ZNF502-<br>,ZNF546+,ZNF585A-,ZNF627--,ZNF639+,ZNF737-,ZNRANB3-                                                                                                                                                                                                                                          |
| blue | BP | GO:0090304 | nucleic acid metabolic process                       | 936 | 4319 | 2.66E-30 | 9.76E-27 | ADAT2-,AHCTF1+,AIMP1-,ANKRD31-,ARMCX3-,ASF1A-,ATF6-,ATR-<br>,ATRX+,BLM+,BLZF1-,BMI1+,BMT2+,BRWD1+,CBX5+,CDK13+,CETN2-<br>,CHD1+,CHURC1--,CLNS1A-,CLOCK+,CNOT10--,CPSF3-,CREBRF+,CREG1-,CRLF3+,CTH-<br>,DCAF13-,DEK+,DNAJC2+,DUS4L-,ECD-,EGLN1+,EIF2A-,ELOC-,EPC1+,EPC2++,EPRS1-<br>,ETV1-,FANCF-,FASTKD3-,FIP1L1-,FOXO3+,G3BP1+,GALR1-,GEMIN2-,GTF2A2-,GTF2B-<br>,GTF2E1-,GTF2H3-,GTF2H5-,H4C3-,HIGD1A-,HMGN1-,IK-<br>,INO80D+,INTS6+,JAK2+,LCOR++,LCORL+,LIG4-,LIN9+,LSM3-,MAGOH-<br>,MAP3K2+,MBD2+,MED4-,MEIS2-,METTL15-,MFAP1-,MIER3+,MLF1-,MRPS9--<br>,NAA16++,NBDY-,NCOA4-,NFAT5+,NFE2L3+,ORC3-,OTUD4+,PA2G4-,PHF3+,PLRG1-<br>,POLI-,POLR2K--,POU5F2+,PPP4R2+,PRDX3-,PRKDC-,PRMT3-,PRMT6-<br>,PRPF38B+,PRPF40A+,PRPF4B+,PSMD10-,PSMD14-,PURB+,PUS7+,QTRT2-,RAC1-<br>,RBBP6+,RBMXL1-,RC3H2+,REL+,RESF1+,RHOQ+,RIOK1-,RNF14-<br>,RNF168+,RORA+,RPF1-,SAP18-,SCARNA7+,SETD6+,SETDB2+,SF3B6-,SIRT1+,SLIRP-<br>,SMAD4+,SMARCA1++,SMC5+,SNRPD1-,SNRPE-,SNW1-,SREK1+,SRSF10+,SUPT3H-<br>,TATDN1-,TATDN3-,TDRD3-,TENT2-,TENT4B+,THOC2+,THOC7-,TIPIN-<br>,TOPORS+,TRIP12-,TSN-,TTC21B+,TUT4+,UFL1-,WDHD1--,XRCC4-<br>,YY1+,ZBTB1+,ZBTB44+,ZC3H12C+,ZC3H13-,ZCCHC8+,ZFC3H1+,ZFP3-,ZMYM4-<br>,ZNF141+,ZNF264+,ZNF280C-,ZNF292+,ZNF345+,ZNF383+,ZNF431+,ZNF441-<br>,ZNF442-,ZNF484+,ZNF502-,ZNF546+,ZNF585A-,ZNF627--,ZNF639+,ZNF737-,ZNRANB3- |
| blue | MF | GO:0003723 | RNA binding                                          | 406 | 1537 | 2.55E-29 | 6.25E-26 | AIMP1-,CAPRIN1-,CDK13+,CLNS1A-,CPSF3-,DCAF13-,DDX50-,DEK+,DNAJC2+,EIF2A-<br>,EIF2B1-,EIF2S1-,EIF2S3-,EIF3M-,EIF4E-,EPRS1-,ERH-,FASTKD3-,FIP1L1-,G3BP1+,GDI2-<br>,GFM1-,GNL2-,H4C3-,LSM3-,MAGOH-,MAK16-,MBD2+,MFAP1-,MORC3+,MRPL13-<br>,MRPS18C-,MRPS28-,MRPS35-,MRPS9--,NUDT4+,NUP42-,OTUD4+,PA2G4-,PDIA3-                                                                                                                                                                                                                                                                                                                                                                                                                                                                                                                                                                                                                                                                                                                                                                                                                                                                                                                                                                                                                              |



|      |    |            |                                                  |      |      |          |          |                                                                                                                                                                                                                                                                                                                                                                                                                                                                                                                                                                                                                                                                                                                                                                                                                                                                                                                                                                                                                                                                                                                                                                                                                                                                                                                                                                                                                                                                                                                                                                                                                                                                                                                                                     |
|------|----|------------|--------------------------------------------------|------|------|----------|----------|-----------------------------------------------------------------------------------------------------------------------------------------------------------------------------------------------------------------------------------------------------------------------------------------------------------------------------------------------------------------------------------------------------------------------------------------------------------------------------------------------------------------------------------------------------------------------------------------------------------------------------------------------------------------------------------------------------------------------------------------------------------------------------------------------------------------------------------------------------------------------------------------------------------------------------------------------------------------------------------------------------------------------------------------------------------------------------------------------------------------------------------------------------------------------------------------------------------------------------------------------------------------------------------------------------------------------------------------------------------------------------------------------------------------------------------------------------------------------------------------------------------------------------------------------------------------------------------------------------------------------------------------------------------------------------------------------------------------------------------------------------|
|      |    |            |                                                  |      |      |          |          | ,PIN4-,PRKDC-<br>,PRPF38B+,PRPF40A+,PRPF4B+,PURB+,PUS7+,RBBP6+,RBM48+,RBMXL1-<br>,RC3H2+,RPF1-,SAP18-,SF3B6-,SLIRP-,SNRPD1-,SNRPE-,SNW1-<br>,SREK1+,SRP19+,SRP54-,SRP9-,SRSF10+,SUCLG1-,TBCA-,TDRD3-<br>,TENT4B+,THOC2+,THOC7-,TSN-,TUT4+,YWHAE-,YY1+,ZC3H13-,ZCCHC7-<br>,ZCCHC8+,ZCCHC9-,ZFC3H1+                                                                                                                                                                                                                                                                                                                                                                                                                                                                                                                                                                                                                                                                                                                                                                                                                                                                                                                                                                                                                                                                                                                                                                                                                                                                                                                                                                                                                                                   |
| blue | BP | GO:0034641 | cellular nitrogen compound metabolic process     | 1117 | 5456 | 1.75E-28 | 3.21E-25 | ADAL-- ,ADAT2-,AFG1L-,AHCTF1+,AIMP1-,ANKRD31-,ARMCX3-,ASF1A-,ATF6-,ATIC-<br>,ATP5MG-- ,ATP5PB-- ,ATR-,ATRX+,BLM+,BLZF1-,BMI1+,BMT2+,BPNT1-<br>,BRWD1+,CAPRIN1-,CBX5+,CDK13+,CETN2-,CHD1+,CHURC1-- ,CLNS1A-,CLOCK+,CLPX-<br>,CNOT10-- ,CPSF3-,CREBRF+,CREG1-,CRLF3+,CTH-,DCAF13-,DDAH1-<br>,DEK+,DNAJC2+,DUS4L-,ECD-,EGLN1+,EIF2A-,EIF2B1-,EIF2S1-,EIF2S3-,EIF3M-,EIF4E-<br>,ELOC-,EPC1+,EPC2++ ,EPRS1-,ERH-,ETV1-,FANCF-,FASTKD3-,FIP1L1-<br>,FOXO3+,G3BP1+,GALR1-,GART-,GEMIN2-,GFM1-,GLO1-,GNPNAT1+,GPD2-,GTF2A2-<br>,GTF2B-,GTF2E1-,GTF2H3-,GTF2H5-,H4C3-,HIGD1A-,HMGN1-,HSD17B12-,IK-<br>,INO80D+,INTS6+,ITGB8+,JAK2+,LCOR++ ,LCORL+,LIAS-,LIG4-,LIN9+,LRRK2-,LSM3-<br>,MAGOH-,MAP3K2+,MBD2+,ME1-,ME2-,MED4-,MEIS2-,METTL15-,MFAP1-<br>,MIER3+,MLF1-,MPC1-- ,MRPL13-,MRPL47-,MRPL51-,MRPS18C-,MRPS28-,MRPS35-<br>,MRPS9-- ,NAA16++ ,NBDY-,NCOA4-,NDUFA12-,NDUFC1-,NDUFS4-<br>,NFAT5+,NFE2L3+,NIPSNAP2-,NUDT12-,NUDT4+,NUP42-,NUP54-,ORC3-<br>,OTUD4+,PA2G4-,PDHB-,PDHX-,PHF3+,PLRG1-,POLI-,POLR2K--<br>,POU5F2+,PPP4R2+,PRDX3-,PRKDC-,PRMT3-,PRMT6-<br>,PRPF38B+,PRPF40A+,PRPF4B+,PSMD10-,PSMD14-,PURB+,PUS7+,QTRT2-,RAC1-<br>,RBBP6+,RBMXL1-,RC3H2+,REL+,RESF1+,RHOQ+,RIOK1-,RNF14-<br>,RNF168+,RORA+,RPF1-,SAP18-,SCARNA7+,SDHD-,SETD6+,SETDB2+,SF3B6-<br>,SIRT1+,SLC35A3+,SLIRP-,SMAD4+,SMARCA1++ ,SMC5+,SNRPD1-,SNRPE-,SNW1-<br>,SPCS2-,SREK1+,SRP9-,SRSF10+,SUCLG1-,SUPT3H-,TATDN1-,TATDN3-,TDRD3-,TENT2-<br>,TENT4B+,THOC2+,THOC7-,TIPIN-,TMA7-,TOPORS+,TRIP12-,TSN-<br>,TTC21B+,TUT4+,UFL1-,WDHD1-- ,XRCC4-,YY1+,ZBTB1+,ZBTB44+,ZC3H12C+,ZC3H13-<br>,ZCCHC8+,ZFC3H1+,ZFP3-,ZMYM4-,ZNF141+,ZNF264+,ZNF280C-<br>,ZNF292++ ,ZNF345+,ZNF383+,ZNF431+,ZNF441-,ZNF442-,ZNF484+,ZNF502-<br>,ZNF546+,ZNF585A-,ZNF627-- ,ZNF639+,ZNF737-,ZRBANB3- |
| blue | BP | GO:0006139 | nucleobase-containing compound metabolic process | 1011 | 4885 | 6.93E-26 | 1.02E-22 | ADAL-- ,ADAT2-,AFG1L-,AHCTF1+,AIMP1-,ANKRD31-,ARMCX3-,ASF1A-,ATF6-,ATIC-<br>,ATP5MG-- ,ATP5PB-- ,ATR-,ATRX+,BLM+,BLZF1-,BMI1+,BMT2+,BPNT1-<br>,BRWD1+,CBX5+,CDK13+,CETN2-,CHD1+,CHURC1-- ,CLNS1A-,CLOCK+,CLPX-<br>,CNOT10-- ,CPSF3-,CREBRF+,CREG1-,CRLF3+,CTH-,DCAF13-,DEK+,DNAJC2+,DUS4L-,ECD-<br>,EGLN1+,EIF2A-,ELOC-,EPC1+,EPC2++ ,EPRS1-,ERH-,ETV1-,FANCF-,FASTKD3-,FIP1L1-<br>,FOXO3+,G3BP1+,GALR1-,GART-,GEMIN2-,GNPNAT1+,GPD2-,GTF2A2-,GTF2B-<br>,GTF2E1-,GTF2H3-,GTF2H5-,H4C3-,HIGD1A-,HMGN1-,HSD17B12-,IK-<br>,INO80D+,INTS6+,JAK2+,LCOR++ ,LCORL+,LIG4-,LIN9+,LRRK2-,LSM3-,MAGOH-<br>,MAP3K2+,MBD2+,ME1-,ME2-,MED4-,MEIS2-,METTL15-,MFAP1-,MIER3+,MLF1-<br>,MPC1-- ,MRPS9-- ,NAA16++ ,NBDY-,NCOA4-,NDUFA12-,NDUFC1-,NDUFS4-<br>,NFAT5+,NFE2L3+,NIPSNAP2-,NUDT12-,NUDT4+,NUP42-,NUP54-,ORC3-<br>,OTUD4+,PA2G4-,PDHB-,PDHX-,PHF3+,PLRG1-,POLI-,POLR2K--<br>,POU5F2+,PPP4R2+,PRDX3-,PRKDC-,PRMT3-,PRMT6-<br>,PRPF38B+,PRPF40A+,PRPF4B+,PSMD10-,PSMD14-,PURB+,PUS7+,QTRT2-,RAC1-<br>,RBBP6+,RBMXL1-,RC3H2+,REL+,RESF1+,RHOQ+,RIOK1-,RNF14-<br>,RNF168+,RORA+,RPF1-,SAP18-,SCARNA7+,SDHD-,SETD6+,SETDB2+,SF3B6-<br>,SIRT1+,SLC35A3+,SLIRP-,SMAD4+,SMARCA1++ ,SMC5+,SNRPD1-,SNRPE-,SNW1-<br>,SREK1+,SRSF10+,SUCLG1-,SUPT3H-,TATDN1-,TATDN3-,TDRD3-,TENT2-<br>,TENT4B+,THOC2+,THOC7-,TIPIN-,TOPORS+,TRIP12-,TSN-,TTC21B+,TUT4+,UFL1-<br>,WDHD1-- ,XRCC4-,YY1+,ZBTB1+,ZBTB44+,ZC3H12C+,ZC3H13-<br>,ZCCHC8+,ZFC3H1+,ZFP3-,ZMYM4-,ZNF141+,ZNF264+,ZNF280C-<br>,ZNF292++ ,ZNF345+,ZNF383+,ZNF431+,ZNF441-,ZNF442-,ZNF484+,ZNF502-<br>,ZNF546+,ZNF585A-,ZNF627-- ,ZNF639+,ZNF737-,ZRBANB3-                                                                                                                                                            |

|      |    |            |                                              |      |      |          |          |                                                                                                                                                                                                                                                                                                                                                                                                                                                                                                                                                                                                                                                                                                                                                                                                                                                                                                                                                                                                                                                                                                                                                                                                                                                                                                                                                                                                                                                                                                    |
|------|----|------------|----------------------------------------------|------|------|----------|----------|----------------------------------------------------------------------------------------------------------------------------------------------------------------------------------------------------------------------------------------------------------------------------------------------------------------------------------------------------------------------------------------------------------------------------------------------------------------------------------------------------------------------------------------------------------------------------------------------------------------------------------------------------------------------------------------------------------------------------------------------------------------------------------------------------------------------------------------------------------------------------------------------------------------------------------------------------------------------------------------------------------------------------------------------------------------------------------------------------------------------------------------------------------------------------------------------------------------------------------------------------------------------------------------------------------------------------------------------------------------------------------------------------------------------------------------------------------------------------------------------------|
| blue | BP | GO:0006396 | RNA processing                               | 261  | 897  | 9.19E-26 | 1.12E-22 | ADAT2-,BMT2+,CDK13+,CLNS1A-,CPSF3-,DCAF13-,DUS4L-,ECD-,FIP1L1-,GEMIN2-,GTF2H3-,GTF2H5-,IK-,INTS6+,LSM3-,MAGOH-,METTL15-,MFAP1-,MRPS9--,NBDY-,PA2G4-,PLRG1-,POLR2K--,PPP4R2+,PRPF38B+,PRPF40A+,PRPF4B+,PUS7+,QTRT2-,RBBP6+,RBMXL1-,RIOK1-,RPF1-,SAP18-,SCARNA7+,SF3B6-,SIRT1+,SNRPD1-,SNRPE-,SNW1-,SREK1+,SRSF10+,TENT2-,TENT4B+,THOC2+,THOC7-,TSN-,TUT4+,ZC3H13-,ZCCHC8+,ZFC3H1+                                                                                                                                                                                                                                                                                                                                                                                                                                                                                                                                                                                                                                                                                                                                                                                                                                                                                                                                                                                                                                                                                                                   |
| blue | BP | GO:0046483 | heterocycle metabolic process                | 1025 | 4987 | 2.94E-25 | 3.08E-22 | ADAL--,ADAT2-,AFG1L-,AHCTF1+,AIMP1-,ANKRD31-,ARMCX3-,ASF1A-,ATF6-,ATIC-,ATP5MG--,ATP5PB--,ATR-,ATRX+,BLM+,BLZF1-,BMI1+,BMT2+,BPNT1-,BRWD1+,CBX5+,CDK13+,CETN2-,CHD1+,CHURC1--,CLNS1A-,CLOCK+,CLPX-,CNOT10--,CPSF3-,CREBRF+,CREG1-,CRLF3+,CTH-,DCAF13-,DEK+,DNAJC2+,DUS4L-,ECD-,EGLN1+,EIF2A-,ELOC-,EPC1+,EPC2++,EPRS1-,ERH-,ETV1-,FANCF-,FASTKD3-,FIP1L1-,FOXO3+,G3BP1+,GALR1-,GART-,GEMIN2-,GNPNAT1+,GPD2-,GTF2A2-,GTF2B-,GTF2E1-,GTF2H3-,GTF2H5-,H4C3-,HIGD1A-,HMG1-,HSD17B12-,IK-,INO80D+,INTS6+,JAK2+,LCOR++,LCORL+,LIAS-,LIG4-,LIN9+,LRRK2-,LSM3-,MAGOH-,MAP3K2+,MBD2+,ME1-,ME2-,MED4-,MEIS2-,METTL15-,MFAP1-,MIER3+,MLF1-,MMUT-,MPC1--,MRPS9--,MTR-,NAA16++,NBDY-,NCOA4-,NDUFA12-,NDUFC1-,NDUFS4-,NFAT5+,NFE2L3+,NIPSNAP2-,NUDT12-,NUDT4+,NUP42-,NUP54-,ORC3-,OTUD4+,PA2G4-,PDHB-,PDHX-,PHF3+,PLRG1-,POLI-,POLR2K--,POU5F2+,PPP4R2+,PRDX3-,PRKDC-,PRMT3-,PRMT6-,PRPF38B+,PRPF40A+,PRPF4B+,PSMD10-,PSMD14-,PURB+,PUS7+,QTRT2-,RAC1-,RBBP6+,RBMXL1-,RC3H2+,REL+,RESF1+,RHOQ+,RIOK1-,RNF14-,RNF168+,RORA+,RPF1-,SAP18-,SCARNA7+,SDHD-,SETD6+,SETDB2+,SF3B6-,SIRT1+,SLC35A3+,SLIRP-,SMAD4+,SMARCA1++,SMC5+,SNRPD1-,SNRPE-,SNW1-,SREK1+,SRSF10+,SUCLG1-,SUPT3H-,TATDN1-,TATDN3-,TDRD3-,TENT2-,TENT4B+,THOC2+,THOC7-,TIPIN-,TOPORS+,TRIP12-,TSN-,TTC21B+,TUT4+,UFL1-,WDHD1--,XRCC4-,YY1+,ZBTB1+,ZBTB44+,ZC3H12C+,ZC3H13-,ZCCHC8+,ZFC3H1+,ZFP3-,ZMYM4-,ZNF141+,ZNF264+,ZNF280C-,ZNF292+,ZNF345+,ZNF383+,ZNF431+,ZNF441-,ZNF442-,ZNF484+,ZNF502-,ZNF546+,ZNF585A-,ZNF627--,ZNF639+,ZNF737-,ZNRANB3-  |
| blue | BP | GO:0006725 | cellular aromatic compound metabolic process | 1025 | 5017 | 3.30E-24 | 3.03E-21 | ADAL--,ADAT2-,AFG1L-,AHCTF1+,AIMP1-,ANKRD31-,ARMCX3-,ASF1A-,ATF6-,ATIC-,ATP5MG--,ATP5PB--,ATR-,ATRX+,BLM+,BLZF1-,BMI1+,BMT2+,BPNT1-,BRWD1+,CBX5+,CDK13+,CETN2-,CHD1+,CHURC1--,CLNS1A-,CLOCK+,CLPX-,CNOT10--,CPSF3-,CREBRF+,CREG1-,CRLF3+,CTH-,DCAF13-,DEK+,DNAJC2+,DUS4L-,ECD-,EGLN1+,EIF2A-,ELOC-,EPC1+,EPC2++,EPRS1-,ERH-,ETV1-,FANCF-,FASTKD3-,FIP1L1-,FOXO3+,G3BP1+,GALR1-,GART-,GEMIN2-,GNPNAT1+,GPD2-,GTF2A2-,GTF2B-,GTF2E1-,GTF2H3-,GTF2H5-,H4C3-,HIGD1A-,HMG1-,HSD17B12-,IK-,INO80D+,INTS6+,JAK2+,LCOR++,LCORL+,LIG4-,LIN9+,LRRK2-,LSM3-,MAGOH-,MAP3K2+,MBD2+,ME1-,ME2-,MED4-,MEIS2-,METTL15-,MFAP1-,MIER3+,MLF1-,MMUT-,MPC1--,MRPS9--,MTR-,NAA16++,NBDY-,NCOA4-,NDUFA12-,NDUFC1-,NDUFS4-,NFAT5+,NFE2L3+,NIPSNAP2-,NUDT12-,NUDT4+,NUP42-,NUP54-,ORC3-,OTUD4+,PA2G4-,PDHB-,PDHX-,PHF3+,PLRG1-,POLI-,POLR2K--,POU5F2+,PPP4R2+,PRDX3-,PRKDC-,PRMT3-,PRMT6-,PRPF38B+,PRPF40A+,PRPF4B+,PSMD10-,PSMD14-,PURB+,PUS7+,QTRT2-,RAC1-,RBBP6+,RBMXL1-,RC3H2+,REL+,RESF1+,RHOQ+,RIOK1-,RNF14-,RNF168+,RORA+,RPF1-,SAP18-,SCARNA7+,SDHD-,SETD6+,SETDB2+,SF3B6-,SIRT1+,SLC35A3+,SLIRP-,SMAD4+,SMARCA1++,SMC5+,SNRPD1-,SNRPE-,SNW1-,SREK1+,SRSF10+,SUCLG1-,SUPT3H-,TATDN1-,TATDN3-,TDRD3-,TENT2-,TENT4B+,THOC2+,THOC7-,TIPIN-,TOPORS+,TRIP12-,TRPC1-,TSN-,TTC21B+,TUT4+,UFL1-,WDHD1--,XRCC4-,YY1+,ZBTB1+,ZBTB44+,ZC3H12C+,ZC3H13-,ZCCHC8+,ZFC3H1+,ZFP3-,ZMYM4-,ZNF141+,ZNF264+,ZNF280C-,ZNF292+,ZNF345+,ZNF383+,ZNF431+,ZNF441-,ZNF442-,ZNF484+,ZNF502-,ZNF546+,ZNF585A-,ZNF627--,ZNF639+,ZNF737-,ZNRANB3- |
| blue | MF | GO:1901363 | heterocyclic compound binding                | 1018 | 4946 | 8.17E-24 | 6.67E-21 | ABCD3-,AFG1L-,AGPS-,AHCTF1+,AIMP1-,ALDH1A1-,ATF6-,ATR-,ATRX+,BLM+,BLZF1-,CAPRIN1-,CDK13+,CDKL3-,CHD1+,CLNS1A-,CLOCK+,CLPX-,CPSF3-,CREBRF+,CRLF3+,CTH-,DBT-,DCAF13-,DDX50-,DEK+,DGKH-,DNAJC2+,DUS4L-,EIF2A-                                                                                                                                                                                                                                                                                                                                                                                                                                                                                                                                                                                                                                                                                                                                                                                                                                                                                                                                                                                                                                                                                                                                                                                                                                                                                         |

|      |    |            |                                                  |     |      |          |          |                                                                                                                                                                                                                                                                                                                                                                                                                                                                                                                                                                                                                                                                                                                                                                                                                                                                                                                                                                                                                                                                                                                                                                                                                                                                                                                                   |
|------|----|------------|--------------------------------------------------|-----|------|----------|----------|-----------------------------------------------------------------------------------------------------------------------------------------------------------------------------------------------------------------------------------------------------------------------------------------------------------------------------------------------------------------------------------------------------------------------------------------------------------------------------------------------------------------------------------------------------------------------------------------------------------------------------------------------------------------------------------------------------------------------------------------------------------------------------------------------------------------------------------------------------------------------------------------------------------------------------------------------------------------------------------------------------------------------------------------------------------------------------------------------------------------------------------------------------------------------------------------------------------------------------------------------------------------------------------------------------------------------------------|
|      |    |            |                                                  |     |      |          |          | ,EIF2B1-,EIF2S1-,EIF2S3-,EIF3M-,EIF4E-,EPRS1-,ERH-,ETV1-,FASTKD3-,FIP1L1-,FOXO3+,G3BP1+,GART-,GDI2-,GFM1-,GNL2-,GTF2B-,GTF2H5-,GVINP1--,H4C3-,HMGN1-,JAK2+,LCOR++,LCORL+,LIG4-,LIN9+,LONP2-,LRRK2-,LSM3-,MAGOH-,MAK16-,MAP3K2+,MBD2+,ME1-,ME2-,MEIS2-,MFAP1-,MIER3+,MLF1-,MMUT-,MORC3+,MRPL13-,MRPS18C-,MRPS28-,MRPS35-,MRPS9--,MTR-,NFAT5+,NFE2L3+,NUDT4+,NUP42-,ORC3-,OTUD4+,PA2G4-,PDIA3-,PIN4-,PLPBP-,POLI-,POLR2K--,POU5F2+,PRKDC-,PRMT3-,PRPF38B+,PRPF40A+,PRPF4B+,PURB+,PUS7+,RABL3-,RAC1-,RBBP6+,RBM48+,RBMXL1-,RC3H2+,REL+,RHEB-,RHOQ+,RIOK1-,RORA+,RPF1-,SAP18-,SAR1A-,SCP2-,SDHD-,SETDB2+,SF3B6-,SIRT1+,SLFN5-,SLIRP-,SMAD4+,SMARCA1++,SMC5+,SNRPD1-,SNRPE-,SNW1-,SREK1+,SRP19+,SRP54-,SRP9-,SRSF10+,SUCLG1-,SUPT3H-,TBCA-,TDRD3-,TENT2-,TENT4B+,THOC2+,THOC7-,TIPIN-,TLK1-,TOPORS+,TSN-,TUT4+,UBE2E1-,WDHD1--,YWHAE-,YY1+,ZBTB1+,ZBTB44+,ZC3H13-,ZCCHC7-,ZCCHC8+,ZCCHC9-,ZFC3H1+,ZFP3-,ZMYM4-,ZNF141+,ZNF264+,ZNF280C-,ZNF292++,ZNF345+,ZNF383+,ZNF431+,ZNF441-,ZNF442-,ZNF484+,ZNF502-,ZNF546+,ZNF585A-,ZNF627--,ZNF639+,ZNF737-,ZNRANB3-                                                                                                                                                                                                                                                                            |
| blue | BP | GO:0010467 | gene expression                                  | 935 | 4514 | 4.54E-23 | 3.33E-20 | ADAT2-,AHCTF1+,AIMP1-,ARMCX3-,ASF1A-,ATF6-,ATRX+,BIRC3+,BLM+,BLZF1-,BMI1+,BMT2+,BRWD1+,CAPRIN1-,CBX5+,CDK13+,CHD1+,CHURC1--,CIAO2A-,CLNS1A-,CLOCK+,CNOT10--,CNPY2--,CPSF3-,CREBRF+,CREG1-,CRLF3+,CTH-,DCAF13-,DEK+,DNAJB11-,DNAJC2+,DUS4L-,ECD-,EGLN1+,EIF2A-,EIF2B1-,EIF2S1-,EIF2S3-,EIF3M-,EIF4E-,ELOC-,EPC1+,EPC2++,EPRS1-,ETV1-,FASTKD3-,FIP1L1-,FOXO3+,GALR1-,GEMIN2-,GFM1-,GTF2A2-,GTF2B-,GTF2E1-,GTF2H3-,GTF2H5-,H4C3-,HIGD1A-,HMGN1-,IK-,IMMP1L-,INTS6+,ISCA2-,ITGB8+,JAK2+,LCOR++,LCORL+,LIN9+,LONP2-,LRRK2-,LSM3-,MAGOH-,MAP3K2+,MBD2+,MED4-,MEIS2-,METTL15-,MFAP1-,MIER3+,MLF1-,MRPL13-,MRPL47-,MRPL51-,MRPS18C-,MRPS28-,MRPS35-,MRPS9--,NAA16++,NBDY-,NCOA4-,NF1-,NFAT5+,NFE2L3+,NUP42-,NUP54-,PA2G4-,PHF3+,PLGRKT-,PLRG1-,POLR2K--,POU5F2+,PPP4R2+,PRDX3-,PRKDC-,PRMT3-,PRMT6-,PRPF38B+,PRPF40A+,PRPF4B+,PSMD10-,PSMD14-,PURB+,PUS7+,QTRT2-,RBBP6+,RBMXL1-,RC3H2+,REL+,RESF1+,RHOQ+,RIOK1-,RNF14-,RNF168+,RORA+,RPF1-,SAP18-,SCARNA7+,SETD6+,SETDB2+,SF3B6-,SIRT1+,SMAD4+,SMARCA1++,SNRPD1-,SNRPE-,SNW1-,SPCS2-,SREK1+,SRP9-,SRSF10+,SUPT3H-,TENT2-,TENT4B+,THOC2+,THOC7-,TMA7-,TOPORS+,TSN-,TTC21B+,TUT4+,UFL1-,WDHD1--,YY1+,ZBTB1+,ZBTB44+,ZC3H13-,ZCCHC8+,ZFC3H1+,ZFP3-,ZMYM4-,ZNF141+,ZNF264+,ZNF280C-,ZNF292+,ZNF345+,ZNF383+,ZNF431+,ZNF441-,ZNF442-,ZNF484+,ZNF502-,ZNF546+,ZNF585A-,ZNF627--,ZNF639+,ZNF737- |
| cyan | BP | GO:0006119 | oxidative phosphorylation                        | 26  | 122  | 1.96E-13 | 1.04E-09 | ATP5F1A-,ATP5F1B--,ATP5F1C--,ATP5F1E-,ATP5MC3-,ATP5PF-,ATP5PO-,COX15--,COX5A-,COX7A2-,COX7B-,COX7C-,NDUFA1--,NDUFA4-,NDUFA6--,NDUFAB1-,NDUFAF1-,NDUFB1--,NDUFB3--,NDUFB4-,PARK7-,UQCRC2--                                                                                                                                                                                                                                                                                                                                                                                                                                                                                                                                                                                                                                                                                                                                                                                                                                                                                                                                                                                                                                                                                                                                         |
| cyan | BP | GO:0009144 | purine nucleoside triphosphate metabolic process | 33  | 291  | 4.17E-13 | 1.04E-09 | ATP5F1A-,ATP5F1B--,ATP5F1C--,ATP5F1E-,ATP5MC3-,ATP5PF-,ATP5PO-,BPGM--,COX15--,COX5A-,COX7A2-,COX7B-,COX7C-,DGUOK-,NDUFA1--,NDUFA4-,NDUFA6--,NDUFAB1-,NDUFAF1-,NDUFB1--,NDUFB3--,NDUFB4-,PARK7-,PGAM1-,PRKAG1--,UQCRC2--                                                                                                                                                                                                                                                                                                                                                                                                                                                                                                                                                                                                                                                                                                                                                                                                                                                                                                                                                                                                                                                                                                           |
| cyan | BP | GO:0046034 | ATP metabolic process                            | 31  | 257  | 4.24E-13 | 1.04E-09 | ATP5F1A-,ATP5F1B--,ATP5F1C--,ATP5F1E-,ATP5MC3-,ATP5PF-,ATP5PO-,BPGM--,COX15--,COX5A-,COX7A2-,COX7B-,COX7C-,NDUFA1--,NDUFA4-,NDUFA6--,NDUFAB1-,NDUFAF1-,NDUFB1--,NDUFB3--,NDUFB4-,PARK7-,PGAM1-,PRKAG1--,UQCRC2--                                                                                                                                                                                                                                                                                                                                                                                                                                                                                                                                                                                                                                                                                                                                                                                                                                                                                                                                                                                                                                                                                                                  |
| cyan | BP | GO:0044281 | small molecule metabolic process                 | 76  | 1709 | 6.47E-13 | 1.19E-09 | ATP5F1A-,ATP5F1B--,ATP5F1C--,ATP5F1E-,ATP5MC3-,ATP5PF-,ATP5PO-,BPGM--,CHP1-,COX15--,COX5A-,COX7A2-,COX7B-,COX7C-,DGUOK-,FARSB-,FH-,FUCA1-,GSTO1-,HEXB-,KARS1-,LCMT1-,LGMN-,MGST3-,NDUFA1--,NDUFA4-,NDUFA6--,NDUFAB1-,NDUFAF1-,NDUFB1--,NDUFB3--,NDUFB4-,OSBP-,PARK7-,PECR-,PGAM1-,PPCS-,PPT1--,PRKAG1--,PSMB2-,PSMB4-,PSMC2-,PSMD13-,PUDP-,RDH11-,RRM1-,SARS1-,SDHB-,SRR--,UQCRC2--,VDAC1-                                                                                                                                                                                                                                                                                                                                                                                                                                                                                                                                                                                                                                                                                                                                                                                                                                                                                                                                        |

|                       |    |            |                                                                       |     |      |          |          |                                                                                                                                                                                                                                                           |
|-----------------------|----|------------|-----------------------------------------------------------------------|-----|------|----------|----------|-----------------------------------------------------------------------------------------------------------------------------------------------------------------------------------------------------------------------------------------------------------|
| <b>cyan</b>           | BP | GO:0009205 | purine ribonucleoside triphosphate metabolic process                  | 32  | 285  | 1.32E-12 | 1.68E-09 | ATP5F1A-,ATP5F1B--,ATP5F1C--,ATP5F1E-,ATP5MC3-,ATP5PF-,ATP5PO-,BPGM--,COX15--,COX5A-,COX7A2-,COX7B-,COX7C-,NDUFA1--,NDUFA4-,NDUFA6--,NDUFAB1-,NDUFAF1-,NDUFB1--,NDUFB3--,NDUFB4-,PARK7-,PGAM1-,PRKAG1--,UQCRC2--                                          |
| <b>cyan</b>           | BP | GO:0009123 | nucleoside monophosphate metabolic process                            | 33  | 321  | 1.57E-12 | 1.68E-09 | ATP5F1A-,ATP5F1B--,ATP5F1C--,ATP5F1E-,ATP5MC3-,ATP5PF-,ATP5PO-,BPGM--,COX15--,COX5A-,COX7A2-,COX7B-,COX7C-,DGUOK-,NDUFA1--,NDUFA4-,NDUFA6--,NDUFAB1-,NDUFAF1-,NDUFB1--,NDUFB3--,NDUFB4-,PARK7-,PGAM1-,PRKAG1--,UQCRC2--                                   |
| <b>cyan</b>           | BP | GO:0009141 | nucleoside triphosphate metabolic process                             | 33  | 309  | 1.91E-12 | 1.68E-09 | ATP5F1A-,ATP5F1B--,ATP5F1C--,ATP5F1E-,ATP5MC3-,ATP5PF-,ATP5PO-,BPGM--,COX15--,COX5A-,COX7A2-,COX7B-,COX7C-,DGUOK-,NDUFA1--,NDUFA4-,NDUFA6--,NDUFAB1-,NDUFAF1-,NDUFB1--,NDUFB3--,NDUFB4-,PARK7-,PGAM1-,PRKAG1--,UQCRC2--                                   |
| <b>cyan</b>           | BP | GO:0009199 | ribonucleoside triphosphate metabolic process                         | 32  | 291  | 2.01E-12 | 1.68E-09 | ATP5F1A-,ATP5F1B--,ATP5F1C--,ATP5F1E-,ATP5MC3-,ATP5PF-,ATP5PO-,BPGM--,COX15--,COX5A-,COX7A2-,COX7B-,COX7C-,NDUFA1--,NDUFA4-,NDUFA6--,NDUFAB1-,NDUFAF1-,NDUFB1--,NDUFB3--,NDUFB4-,PARK7-,PGAM1-,PRKAG1--,UQCRC2--                                          |
| <b>cyan</b>           | BP | GO:0009161 | ribonucleoside monophosphate metabolic process                        | 32  | 304  | 2.06E-12 | 1.68E-09 | ATP5F1A-,ATP5F1B--,ATP5F1C--,ATP5F1E-,ATP5MC3-,ATP5PF-,ATP5PO-,BPGM--,COX15--,COX5A-,COX7A2-,COX7B-,COX7C-,NDUFA1--,NDUFA4-,NDUFA6--,NDUFAB1-,NDUFAF1-,NDUFB1--,NDUFB3--,NDUFB4-,PARK7-,PGAM1-,PRKAG1--,UQCRC2--                                          |
| <b>cyan</b>           | BP | GO:0009167 | purine ribonucleoside monophosphate metabolic process                 | 31  | 291  | 4.47E-12 | 3.28E-09 | ATP5F1A-,ATP5F1B--,ATP5F1C--,ATP5F1E-,ATP5MC3-,ATP5PF-,ATP5PO-,BPGM--,COX15--,COX5A-,COX7A2-,COX7B-,COX7C-,NDUFA1--,NDUFA4-,NDUFA6--,NDUFAB1-,NDUFAF1-,NDUFB1--,NDUFB3--,NDUFB4-,PARK7-,PGAM1-,PRKAG1--,UQCRC2--                                          |
| <b>Dark grey</b>      | MF | GO:0140110 | transcription regulator activity                                      | 8   | 1623 | 7.05E-05 | 0.31     | TCP10L+,ZNF749+                                                                                                                                                                                                                                           |
| <b>Dark grey</b>      | MF | GO:0000981 | DNA-binding transcription factor activity, RNA polymerase II-specific | 7   | 1209 | 8.51E-05 | 0.31     | ZNF749+                                                                                                                                                                                                                                                   |
| <b>Dark grey</b>      | MF | GO:0003700 | DNA-binding transcription factor activity                             | 7   | 1298 | 0.00014  | 0.33     | ZNF749+                                                                                                                                                                                                                                                   |
| <b>Dark grey</b>      | BP | GO:0006357 | regulation of transcription by RNA polymerase II                      | 8   | 2123 | 0.00049  | 0.90     | TCP10L+,ZNF749+                                                                                                                                                                                                                                           |
| <b>Dark grey</b>      | BP | GO:0006366 | transcription by RNA polymerase II                                    | 8   | 2250 | 0.00075  | 1        | TCP10L+,ZNF749+                                                                                                                                                                                                                                           |
| <b>Dark turquoise</b> | MF | GO:0043138 | 3'-5' DNA helicase activity                                           | 2   | 19   | 0.0025   | 1        |                                                                                                                                                                                                                                                           |
| <b>Dark turquoise</b> | MF | GO:0016787 | hydrolase activity                                                    | 17  | 1995 | 0.0035   | 1        | METAP1D-,RAB4B-,RGS11-,USP31+                                                                                                                                                                                                                             |
| <b>Dark turquoise</b> | MF | GO:0003824 | catalytic activity                                                    | 31  | 4682 | 0.0038   | 1        | METAP1D-,PDIA2-,RAB4B-,RGS11-,RNF130+,USP31+                                                                                                                                                                                                              |
| <b>Dark turquoise</b> | MF | GO:0004843 | thiol-dependent ubiquitin-specific protease activity                  | 3   | 84   | 0.0040   | 1        | USP31+                                                                                                                                                                                                                                                    |
| <b>Dark turquoise</b> | MF | GO:0036459 | thiol-dependent ubiquitinyl hydrolase activity                        | 3   | 92   | 0.0054   | 1        | USP31+                                                                                                                                                                                                                                                    |
| <b>Green yellow</b>   | BP | GO:0050896 | response to stimulus                                                  | 293 | 6519 | 7.93E-17 | 5.37E-13 | ABCG2-,AKR1C1+,ANO6+,BMP6-,C7+,CASP7+,CASQ2-,CCND1-,CD58+,CFI+,CLEC2B+,CLEC5A++,CTNND1-,EPS8-,FBXO32+,FOXN3+,GBP2+,HEBP2++,HIPK1+,IFI16+,IFNAR2-,IL13RA1+,IQGAP2+,KDR-,LEPROT-,LYZ+,MAML2+,MYL9-,NEDD4++,NPNT+,PRRX1+,PYGL+,RAB13+,RAB29+,RASSF3++,RECQL- |

|                     |    |            |                                                                       |     |      |          |          |                                                                                                                                                                                |
|---------------------|----|------------|-----------------------------------------------------------------------|-----|------|----------|----------|--------------------------------------------------------------------------------------------------------------------------------------------------------------------------------|
|                     |    |            |                                                                       |     |      |          |          | ,S100A4+,SLC40A1-,SLC7A2++,SMOC2-,STK38+,SWAP70+,TRIB2-,UBR5+,WWTR1++,YAP1+                                                                                                    |
| <b>Green yellow</b> | BP | GO:0030198 | extracellular matrix organization                                     | 43  | 287  | 1.46E-16 | 5.37E-13 | COL13A1-,COL14A1-,KDR-,LAMC1+,NID2-,NPNT+,SMOC2-                                                                                                                               |
| <b>Green yellow</b> | BP | GO:0002376 | immune system process                                                 | 133 | 2121 | 2.59E-16 | 6.35E-13 | ANO6+,BMP6-,C7+,CD58+,CFI+,CLEC2B+,CLEC5A++,EPS8-,GBP2+,HEBP2++,HIPK1+,IFI16+,IFNAR2-,IQGAP2+,KDR-,LYZ+,MYL9-,PYGL+,RAB29+,SLC40A1-,SLC7A2++,SWAP70+,YAP1+                     |
| <b>Green yellow</b> | MF | GO:0005201 | extracellular matrix structural constituent                           | 29  | 128  | 6.46E-16 | 1.19E-12 | COL13A1-,COL14A1-,LAMC1+,NID2-,NPNT+                                                                                                                                           |
| <b>Green yellow</b> | BP | GO:0043062 | extracellular structure organization                                  | 44  | 321  | 1.44E-15 | 2.12E-12 | COL13A1-,COL14A1-,KDR-,LAMC1+,NID2-,NPNT+,SMOC2-                                                                                                                               |
| <b>Green yellow</b> | BP | GO:0006955 | immune response                                                       | 95  | 1399 | 7.84E-14 | 9.60E-11 | ANO6+,BMP6-,C7+,CD58+,CFI+,CLEC2B+,CLEC5A++,GBP2+,HEBP2++,IFI16+,IFNAR2-,IQGAP2+,LYZ+,PYGL+,RAB29+,SWAP70+                                                                     |
| <b>Green yellow</b> | BP | GO:0007166 | cell surface receptor signaling pathway                               | 133 | 2245 | 1.98E-13 | 2.08E-10 | ANO6+,BMP6-,CCND1-,CTNND1-,GBP2+,HIPK1+,IFNAR2-,IL13RA1+,KDR-,LEPROT-,MAML2+,NEDD4++,NPNT+,PRRX1+,RAB29+,SMOC2-,UBR5+,WWTR1++,YAP1+                                            |
| <b>Green yellow</b> | BP | GO:0007155 | cell adhesion                                                         | 83  | 1111 | 9.87E-13 | 9.06E-10 | BMP6-,CD58+,COL13A1-,COL14A1-,CTNND1-,KDR-,LAMC1+,LPP+,MYL9-,NID2-,NPNT+,PCDH18+,SMOC2-,SWAP70+                                                                                |
| <b>Green yellow</b> | BP | GO:0022610 | biological adhesion                                                   | 83  | 1115 | 1.16E-12 | 9.44E-10 | BMP6-,CD58+,COL13A1-,COL14A1-,CTNND1-,KDR-,LAMC1+,LPP+,MYL9-,NID2-,NPNT+,PCDH18+,SMOC2-,SWAP70+                                                                                |
| <b>Green yellow</b> | BP | GO:0070887 | cellular response to chemical stimulus                                | 139 | 2502 | 1.68E-12 | 1.24E-09 | ABCG2-,AKR1C1+,ANO6+,BMP6-,CASP7+,CASQ2-,CCND1-,CD58+,EPS8-,FBXO32+,GBP2+,HIPK1+,IFI16+,IFNAR2-,IL13RA1+,KDR-,LEPROT-,NEDD4++,NPNT+,RAB13+,SLC40A1-,SMOC2-,SWAP70+,UBR5+,YAP1+ |
| <b>Light yellow</b> | BP | GO:0051094 | positive regulation of developmental process                          | 21  | 1088 | 3.48E-05 | 0.072    | BMPR1A+,BTG1++,CCDC71L+,FBXO5+,HGF+,KL-,MALT1+,SOCS2+                                                                                                                          |
| <b>Light yellow</b> | BP | GO:0019220 | regulation of phosphate metabolic process                             | 24  | 1403 | 5.33E-05 | 0.072    | BMPR1A+,DUSP6-,HGF+,KL-,MALT1+,PDK1+,SOCS2+                                                                                                                                    |
| <b>Light yellow</b> | BP | GO:0051174 | regulation of phosphorus metabolic process                            | 24  | 1405 | 5.45E-05 | 0.072    | BMPR1A+,DUSP6-,HGF+,KL-,MALT1+,PDK1+,SOCS2+                                                                                                                                    |
| <b>Light yellow</b> | BP | GO:0045597 | positive regulation of cell differentiation                           | 17  | 785  | 5.45E-05 | 0.072    | BMPR1A+,BTG1++,CCDC71L+,FBXO5+,HGF+,MALT1+,SOCS2+                                                                                                                              |
| <b>Light yellow</b> | BP | GO:0042327 | positive regulation of phosphorylation                                | 17  | 790  | 5.83E-05 | 0.072    | BMPR1A+,DUSP6-,HGF+,KL-,MALT1+                                                                                                                                                 |
| <b>magenta</b>      | MF | GO:0000981 | DNA-binding transcription factor activity, RNA polymerase II-specific | 53  | 1209 | 1.96E-08 | 0.00011  | FOXD4L5+,MLLT3+,RFX7+,ZNF285-,ZNF550+,ZNF776+,ZNF829++,ZSCAN23-                                                                                                                |
| <b>magenta</b>      | MF | GO:0003700 | DNA-binding transcription factor activity                             | 55  | 1298 | 2.97E-08 | 0.00011  | FOXD4L5+,GOLGB1+,MLLT10+,MLLT3+,RFX7+,ZNF285-,ZNF550+,ZNF776+,ZNF829++,ZSCAN23-                                                                                                |
| <b>magenta</b>      | MF | GO:0003677 | DNA binding                                                           | 68  | 1976 | 1.59E-06 | 0.0029   | CENPC+,CXXC4+,FOXD4L5+,GOLGB1+,MLLT10+,REV3L+,RFX7+,SHPRH+,ZNF285-,ZNF550+,ZNF776+,ZNF829++,ZSCAN23-                                                                           |
| <b>magenta</b>      | MF | GO:0140110 | transcription regulator activity                                      | 59  | 1623 | 1.92E-06 | 0.0029   | FOXD4L5+,GOLGB1+,MLLT10+,MLLT3+,RFX7+,ZNF285-,ZNF550+,ZNF776+,ZNF829++,ZSCAN23-                                                                                                |
| <b>magenta</b>      | BP | GO:0044782 | cilium organization                                                   | 21  | 324  | 1.98E-06 | 0.0029   | CEP126+,CFAP44+,HAUS3+                                                                                                                                                         |
| <b>magenta</b>      | BP | GO:0060271 | cilium assembly                                                       | 20  | 309  | 3.51E-06 | 0.0043   | CEP126+,CFAP44+,HAUS3+                                                                                                                                                         |
| <b>magenta</b>      | BP | GO:0061512 | protein localization to cilium                                        | 7   | 47   | 3.48E-05 | 0.036    |                                                                                                                                                                                |
| <b>pink</b>         | BP | GO:0048709 | oligodendrocyte differentiation                                       | 17  | 88   | 1.92E-08 | 0.00014  | DAAM2-,HDAC11-,NKX6-2+                                                                                                                                                         |
| <b>pink</b>         | BP | GO:0010001 | glial cell differentiation                                            | 24  | 189  | 1.29E-07 | 0.00047  | DAAM2-,HDAC11-,NKX6-2+,SIRT2-                                                                                                                                                  |
| <b>pink</b>         | BP | GO:0042063 | gliogenesis                                                           | 27  | 246  | 4.66E-07 | 0.0011   | DAAM2-,E2F1-,HDAC11-,NKX6-2+,SIRT2-,SUN2+                                                                                                                                      |
| <b>pink</b>         | BP | GO:0014013 | regulation of gliogenesis                                             | 15  | 97   | 2.66E-06 | 0.0049   | DAAM2-,E2F1-,NKX6-2+,SIRT2-                                                                                                                                                    |

|        |    |            |                                                 |     |      |          |          |                                                                                                                                                                                                                                                                                                                                                                                                                                                                                                                                                          |
|--------|----|------------|-------------------------------------------------|-----|------|----------|----------|----------------------------------------------------------------------------------------------------------------------------------------------------------------------------------------------------------------------------------------------------------------------------------------------------------------------------------------------------------------------------------------------------------------------------------------------------------------------------------------------------------------------------------------------------------|
| pink   | BP | GO:0042552 | myelination                                     | 16  | 121  | 1.22E-05 | 0.016    | MAL-,NKX6-2+,PLLP-,SIRT2-                                                                                                                                                                                                                                                                                                                                                                                                                                                                                                                                |
| pink   | BP | GO:0007272 | ensheathment of neurons                         | 16  | 123  | 1.52E-05 | 0.016    | MAL-,NKX6-2+,PLLP-,SIRT2-                                                                                                                                                                                                                                                                                                                                                                                                                                                                                                                                |
| pink   | BP | GO:0008366 | axon ensheathment                               | 16  | 123  | 1.52E-05 | 0.016    | MAL-,NKX6-2+,PLLP-,SIRT2-                                                                                                                                                                                                                                                                                                                                                                                                                                                                                                                                |
| pink   | BP | GO:0014003 | oligodendrocyte development                     | 9   | 42   | 1.70E-05 | 0.016    | HDAC11-,NKX6-2+                                                                                                                                                                                                                                                                                                                                                                                                                                                                                                                                          |
| pink   | BP | GO:0014015 | positive regulation of gliogenesis              | 10  | 60   | 5.50E-05 | 0.039    | E2F1-,NKX6-2+                                                                                                                                                                                                                                                                                                                                                                                                                                                                                                                                            |
| pink   | BP | GO:0045685 | regulation of glial cell differentiation        | 10  | 60   | 6.24E-05 | 0.039    | DAAM2-,NKX6-2+                                                                                                                                                                                                                                                                                                                                                                                                                                                                                                                                           |
| salmon | BP | GO:0043933 | protein-containing complex subunit organization | 74  | 1926 | 1.47E-10 | 1.08E-06 | ABT1-,AIMP2-,BBS4-,CCDC115-,CHMP4B-,COA3--,COX14-,DDB1-,EIF3C-,EIF3K-,EIF3L-,EIF4H-,GBA-,GLE1-,H2BC15-,HAX1--,MRPL11-,MRPL2-,MRPL27--,MRPL37-,MRPL54-,MRPL57-,MSRB2-,NDUFA2--,NDUFA8-,NDUFB2--,NDUFB8--,NDUFS3--,NDUFS6-,NFS1--,NME2-,PDCD6-,PDZD11--,PFDN6-,PSMC3--,PSMD4-,SAMM50-,STOML2-,TRAPPC1--,TRAPPC4-,UQCC1-,UQCR10-,VIPAS39-                                                                                                                                                                                                                   |
| salmon | BP | GO:0034622 | cellular protein-containing complex assembly    | 49  | 985  | 3.44E-10 | 1.26E-06 | ABT1-,BBS4-,CCDC115-,COA3--,COX14-,DDB1-,EIF3C-,EIF3K-,EIF3L-,EIF4H-,H2BC15-,HAX1--,MRPL11-,MSRB2-,NDUFA2--,NDUFA8-,NDUFB2--,NDUFB8--,NDUFS3--,NDUFS6-,PFDN6-,PSMC3--,PSMD4-,SAMM50-,UQCC1-,UQCR10-                                                                                                                                                                                                                                                                                                                                                      |
| salmon | BP | GO:0065003 | protein-containing complex assembly             | 64  | 1645 | 6.09E-10 | 1.49E-06 | ABT1-,AIMP2-,BBS4-,CCDC115-,CHMP4B-,COA3--,COX14-,DDB1-,EIF3C-,EIF3K-,EIF3L-,EIF4H-,GBA-,H2BC15-,HAX1--,MRPL11-,MSRB2-,NDUFA2--,NDUFA8-,NDUFB2--,NDUFB8--,NDUFS3--,NDUFS6-,NFS1--,NME2-,PDCD6-,PDZD11--,PFDN6-,PSMC3--,PSMD4-,SAMM50-,STOML2-,TRAPPC1--,TRAPPC4-,UQCC1-,UQCR10-                                                                                                                                                                                                                                                                          |
| salmon | BP | GO:0016043 | cellular component organization                 | 130 | 5383 | 4.51E-09 | 8.27E-06 | ABT1-,ACTG1-,AIMP2-,ALAS1-,ANAPC15--,ATP5MC1-,ATP5MF--,BABAM2-,BBS4-,CAPNS1-,CCDC115-,CHMP4B-,COA3--,COPS6-,COX14-,DDB1-,EIF3C-,EIF3K-,EIF3L-,EIF4H-,FUNDC2-,GBA-,GLE1-,H2BC15-,HAX1--,IFT27--,IQGAP3--,MAP2K5--,MRPL11-,MRPL2-,MRPL27--,MRPL37-,MRPL54-,MRPL57-,MSRB2-,NDUFA2--,NDUFA8-,NDUFB2--,NDUFB8--,NDUFS3--,NDUFS6-,NFS1--,NHP2-,NME2-,NPM3--,PDCD6-,PDZD11--,PEX19-,PEX7-,PFDN6-,PHB2-,PSMC3--,PSMD4-,RAB5B-,SAMM50-,SLC25A5--,STOML2-,STRADA-,SUPT4H1-,TCTN3--,TRAPPC1--,TRAPPC4-,TTC21A-,UQCC1-,UQCR10-,VIPAS39-,VPS25--,VPS33B-,VPS39-       |
| salmon | BP | GO:0071840 | cellular component organization or biogenesis   | 134 | 5565 | 6.72E-09 | 9.86E-06 | ABT1-,ACTG1-,AIMP2-,ALAS1-,ANAPC15--,ATP5MC1-,ATP5MF--,BABAM2-,BBS4-,CAPNS1-,CCDC115-,CHMP4B-,COA3--,COPS6-,COX14-,DDB1-,EIF3C-,EIF3K-,EIF3L-,EIF4H-,FUNDC2-,GBA-,GLE1-,H2BC15-,HAX1--,IFT27--,IQGAP3--,MAP2K5--,MRPL11-,MRPL2-,MRPL27--,MRPL37-,MRPL54-,MRPL57-,MSRB2-,NDUFA2--,NDUFA8-,NDUFB2--,NDUFB8--,NDUFS3--,NDUFS6-,NFS1--,NHP2-,NME2-,NPM3--,PDCD6-,PDZD11--,PEX19-,PEX7-,PFDN6-,PHB2-,POP4-,PSMC3--,PSMD4-,RAB5B-,SAMM50-,SLC25A5--,STOML2-,STRADA-,SUPT4H1-,TCTN3--,TRAPPC1--,TRAPPC4-,TTC21A-,UQCC1-,UQCR10-,VIPAS39-,VPS25--,VPS33B-,VPS39- |
| salmon | BP | GO:0006119 | oxidative phosphorylation                       | 19  | 122  | 2.10E-08 | 2.57E-05 | ATP5MC1-,ATP5MF--,COX411--,COX5B-,COX6B1--,NDUFA2--,NDUFA8-,NDUFB2--,NDUFB8--,NDUFS3--,NDUFS6-,STOML2-,UQCR10-,UQCRC-                                                                                                                                                                                                                                                                                                                                                                                                                                    |
| salmon | BP | GO:0044085 | cellular component biogenesis                   | 83  | 2846 | 5.61E-08 | 5.56E-05 | ABT1-,ACTG1-,AIMP2-,BBS4-,CCDC115-,CHMP4B-,COA3--,COX14-,DDB1-,EIF3C-,EIF3K-,EIF3L-,EIF4H-,GBA-,H2BC15-,HAX1--,IFT27--,MRPL11-,MSRB2-,NDUFA2--,NDUFA8-,NDUFB2--,NDUFB8--,NDUFS3--,NDUFS6-,NFS1--,NHP2-,NME2-,NPM3--,PDCD6-,PDZD11--,PFDN6-,POP4-,PSMC3--,PSMD4-,SAMM50-,STOML2-,TCTN3--,TRAPPC1--,TRAPPC4-,UQCC1-,UQCR10-,VPS25--                                                                                                                                                                                                                        |
| salmon | BP | GO:0022607 | cellular component assembly                     | 76  | 2610 | 6.05E-08 | 5.56E-05 | ABT1-,ACTG1-,AIMP2-,BBS4-,CCDC115-,CHMP4B-,COA3--,COX14-,DDB1-,EIF3C-,EIF3K-,EIF3L-,EIF4H-,GBA-,H2BC15-,HAX1--,IFT27--,MRPL11-,MSRB2-,NDUFA2--,NDUFA8-,NDUFB2--,NDUFB8--,NDUFS3--,NDUFS6-,NFS1--,NME2-,PDCD6-,PDZD11--,PFDN6-,PSMC3--,PSMD4-,SAMM50-,STOML2-,TCTN3--,TRAPPC1--,TRAPPC4-,UQCC1-,UQCR10-,VPS25--                                                                                                                                                                                                                                           |
| salmon | BP | GO:1901564 | organonitrogen compound metabolic process       | 135 | 5499 | 4.17E-07 | 0.00034  | AARSD1-,AHCY-,AIMP2-,AKR1A1-,ALAS1-,ALDH18A1-,ANAPC15--,ATP5MC1-,ATP5MF--,BABAM2-,BPHL-,CAPNS1-,CCDC115-,CHMP4B-,COA3--,COMMD1-,COPS6-,COX411--,COX5B-,COX6B1--,DDB1-,DDOST-,EEF1AKNMT-,EIF3C-,EIF3K-,EIF3L-,EIF4H-                                                                                                                                                                                                                                                                                                                                      |

|           |    |            |                              |      |      |          |         |                                                                                                                                                                                                                                                                                                                                                                                                                                                                                                                                                                                                                                                                                                                                                                                                                                                                                                                                                                                                                                                                                                                                                                                                                                                                                                                                                                                                                                                                                                                                                                                                                                                                                                                                                                                                                                                                                                                                                                                                                                                                                                                                                                                                                                                                        |
|-----------|----|------------|------------------------------|------|------|----------|---------|------------------------------------------------------------------------------------------------------------------------------------------------------------------------------------------------------------------------------------------------------------------------------------------------------------------------------------------------------------------------------------------------------------------------------------------------------------------------------------------------------------------------------------------------------------------------------------------------------------------------------------------------------------------------------------------------------------------------------------------------------------------------------------------------------------------------------------------------------------------------------------------------------------------------------------------------------------------------------------------------------------------------------------------------------------------------------------------------------------------------------------------------------------------------------------------------------------------------------------------------------------------------------------------------------------------------------------------------------------------------------------------------------------------------------------------------------------------------------------------------------------------------------------------------------------------------------------------------------------------------------------------------------------------------------------------------------------------------------------------------------------------------------------------------------------------------------------------------------------------------------------------------------------------------------------------------------------------------------------------------------------------------------------------------------------------------------------------------------------------------------------------------------------------------------------------------------------------------------------------------------------------------|
|           |    |            |                              |      |      |          |         | ,ERP29-,ESYT1-,GBA-,GLE1-,GMPR2-,GSS-,H2BC15-,HAX1--,HMOX2-,IQGAP3--<br>,MAP2K5--,MED8-,MRPL11-,MRPL2-,MRPL27--,MRPL37-,MRPL54-,MRPL57-,MSRB2-<br>,NDUFA2--,NDUFA8-,NDUFB2--,NDUFB8--,NDUFS3--,NDUFS6-,NFS1--,NHLRC1-<br>,NME2-,PDCD6-,PDZD11--,PEBP1--,PHB2-,PSMC3--,PSMD4-,PSMD8-,PSME3--<br>,STOML2-,STRADA-,UQCC1-,UQCR10-,UQCRQ-,VIPAS39-,VPS25--,VPS33B-,ZC3HC1-                                                                                                                                                                                                                                                                                                                                                                                                                                                                                                                                                                                                                                                                                                                                                                                                                                                                                                                                                                                                                                                                                                                                                                                                                                                                                                                                                                                                                                                                                                                                                                                                                                                                                                                                                                                                                                                                                                 |
| salmon    | BP | GO:0006996 | organelle organization       | 86   | 3315 | 6.22E-07 | 0.00046 | ABT1-,ACTG1-,ALAS1-,ANAPC15--,ATP5MC1-,ATP5MF--,BABAM2-,BBS4-,CCDC115-<br>,CHMP4B-,COA3--,COPS6-,COX14-,DDB1-,FUND2-,GBA-,H2BC15-,HAX1--,IFT27--<br>,MRPL11-,MSRB2-,NDUFA2--,NDUFA8-,NDUFB2--,NDUFB8--,NDUFS3--,NDUFS6-<br>,NHP2-,NPM3--,PDCD6-,PEX19-,PEX7-,PHB2-,RAB5B-,SAMM50-,SLC25A5--,STOML2-<br>,SUPT4H1-,TCTN3--,TRAPPC1--,TRAPPC4-,TTC21A-,UQCC1-,UQCR10-,VPS25--<br>,VPS33B-,VPS39-                                                                                                                                                                                                                                                                                                                                                                                                                                                                                                                                                                                                                                                                                                                                                                                                                                                                                                                                                                                                                                                                                                                                                                                                                                                                                                                                                                                                                                                                                                                                                                                                                                                                                                                                                                                                                                                                          |
| turquoise | BP | GO:0044238 | primary metabolic process    | 1543 | 8441 | 3.21E-06 | 0.012   | AAAS-,AARS2-,ABHD14B-,ACADS-,ACAN+,ACOT8+,ACSS1-,ADAM15-,ADAM8-<br>,ADAMTS13-,ADAMTS2++,ADCYAP1R1+,ADIPOR1--,ADPGK-,AGPAT1--,AKR7A2-<br>,ALDH4A1-,ALYREF-,ANKRD9+,APH1A-,APLNR+,APOE-,ARHGFE10L+,ASPHD1-,ATAT1-<br>,ATF5-,ATF6B-,ATG4B+,ATN1+,ATP5MC2-,AUTS2-,B3GALT4-,BCAP31-,BCKDHA-<br>,BOLA1-,BRD1+,BRD2+,BRD4+,BRPF3+,CACNA1H-,CALR--,CASP9-,CBS+,CBY1-<br>,CCDC88C-,CCS--,CES2-,CHST6++,CIB1-,CIC+,CINP-,CLEC3B-,CNDP2-,COMT-,COQ9-<br>,CRAT-,CREBBP+,CRYL1-,CSNK2B-,CST3-,CSTB-,CYB5R3-,DCAF11-,DCAKD-,DDX49-<br>,DELE1-,DESI1-,DGCR8+,DHRS7B-,DHX8-,DIDO1+,DLST-,DOK7+,DUS2-,ECH1-,EDEM2--<br>,EEF2-,EEF2K+,EIF3D-,EIF5A-,ELOB-,ETFB--,FAH-,FAM3A-,FANCE+,FBXL12-<br>,FBXO17+,FBXO6-,FBXW8-,FGFR3-,FIS1-,FKBP2-,FKBP9-,FLAD1-,FLCN+,FMC1-<br>,FN3KRP-,FSTL3+,G6PC3-,G6PD-,GAMT-,GANAB-,GCDH-,GLI1+,GLMP-,GORASP1-<br>,GPAT4+,GPR37L1-,GPX4-,GSTP1-,GTF2H4-,GUK1-,GYS1-,H2BC4-,HDAC4++,HES4--<br>,HES5-,HINT2--,HMBS-,HMGCL-,HNRNPL-,HR-,HRAS-,IKZF4+,IMP4-,INPP5K-,INTS3--<br>,IRAK2++,IRF2BPL+,IRS2++,ITI4-,IVD-,JADE2+,JARID2+,JDP2+,JUND+,KCTD5-<br>,KDM4B+,KDM6B+,KLHL21+,LAMTOR1-,LARS2--,LSM7-,LTBP4+,MAPT-AS1+,MCM3-<br>,MECP2+,MED20-,MFHAS1+,MGMT-,MICAL1-,MMP28--,MPV17L2-,MRM1-,MRPL20-<br>,MRPL24--,MRPL53-,MRPS18B-,MSRB1--,MT3-,MTG2-,MYH3+,NCSTN-,NENF-<br>,NFKBID+,NMRAL1-,NOL3-,NR6A1+,NTHL1-,NUCB1-,NUDT2--,NUP210-,OS9-,PARP3-<br>,PARS2-,PC-,PDCD11-,PDE9A-,PER1+,PEX10-,PIM3+,PLK5+,PLPP4+,PMM2-<br>,PNPLA6+,POLR2G-,POLR2L-,PIPF-,PPP1CA-,PPP1R1B-,PPP4C-,PRELID1-,PRKCD--<br>,PSENEN--,PSMB10-,PTPN7-,PTPRU+,PUF60-,RAD9A-,RASA4+,RBM10-,RECQL5-<br>,RERE+,RETSAT-,RFXANK-,RGMA+,RNF167-,RNF181-,RNF5-,RPN2-,RPS15-,RPS19-<br>,RUBCN+,RUVBL1-,S100A1--,SARDH-,SCARNA13+,SDSL--,SEC13--,SF3A1--,SF3B5-<br>,SH2D3C-,SHISA5-,SKI+,SLC35C2-,SLC44A2--,SMPD1-,SNAPIN-<br>,SNHG12+,SNORA73A+,SNRNP40-,SOX12+,SPRED3-,SRRM2+,STARD10+,SUMF1-<br>,SUMF2-,SURF1-,SWI5-,TAB1-,TBC1D10A-,TFPT-,TIMELESS+,TKFC-,TM7SF2--<br>,TMEM258-,TMPRSS5+,TNFSF13-,TPP1-,TRAPPC9-,TRIM47+,TRIM8+,TRPM4-<br>,TRRAP+,TSHZ1+,TSR2-,TST-,TXN2--,UBE2I+,UQCR11-,URB1+,USP4-,VKORC1-,VRK3-<br>,WNT4+,XYLT2-,ZBED6++,ZBTB7C+,ZDHHC11+,ZDHHC4--,ZMIZ1+,ZNF16-<br>,ZNF219+,ZNF358+,ZNF445+,ZNF496-<br>,ZNF500+,ZNF511+,ZNF589+,ZNF750+,ZNF768+,ZNF853+,ZNHIT1-,ZSCAN25- |
| turquoise | BP | GO:0018205 | peptidyl-lysine modification | 93   | 354  | 5.72E-06 | 0.012   | AAAS-,ATAT1-,AUTS2-,BRD1+,BRD4+,BRPF3+,CREBBP+,FLCN+,HDAC4++,HINT2--<br>,JADE2+,JARID2+,MECP2+,NUP210-,PER1+,RUVBL1-,TRPM4-,TRRAP+,UBE2I+,ZMIZ1+                                                                                                                                                                                                                                                                                                                                                                                                                                                                                                                                                                                                                                                                                                                                                                                                                                                                                                                                                                                                                                                                                                                                                                                                                                                                                                                                                                                                                                                                                                                                                                                                                                                                                                                                                                                                                                                                                                                                                                                                                                                                                                                       |
| turquoise | BP | GO:0008152 | metabolic process            | 1648 | 9084 | 6.43E-06 | 0.012   | AAAS-,AARS2-,ABHD14B-,ACADS-,ACAN+,ACOT8+,ACSS1-,ADAM15-,ADAM8-<br>,ADAMTS13-,ADAMTS2++,ADCYAP1R1+,ADIPOR1--,ADPGK-,AGPAT1--,AKR7A2-<br>,ALDH4A1-,ALKBH6-,ALYREF-,ANKRD9+,APH1A-,APLNR+,APOE-<br>,ARAP1+,ARHGFE10L+,ASPHD1-,ATAT1-,ATF5-,ATF6B-,ATG4B+,ATN1+,ATP5MC2-<br>,AUTS2-,B3GALT4-,BCAP31-,BCKDHA-,BOLA1-,BRD1+,BRD2+,BRD4+,BRPF3+,BSG-<br>,CACNA1H-,CALR--,CASP9-,CBS+,CBY1-,CCDC88C-,CCS--,CES2-,CHMP2A-<br>,CHST6++,CIB1-,CIC+,CINP-,CLEC3B-,CNDP2-,COMT-,COQ9-,CRAT-,CREBBP+,CRYL1-<br>,CSNK2B-,CST3-,CSTB-,CYB5R3-,DCAF11-,DCAKD-,DDX49-,DELE1-,DESI1-<br>,DGCR8+,DHRS7B-,DHX8-,DIDO1+,DLST-,DOK7+,DUS2-,ECH1-,EDEM2--,EEF2-<br>,EEF2K+,EIF3D-,EIF5A-,ELOB-,ETFB--,FAH-,FAM3A-,FANCE+,FBXL12-,FBXO17+,FBXO6-                                                                                                                                                                                                                                                                                                                                                                                                                                                                                                                                                                                                                                                                                                                                                                                                                                                                                                                                                                                                                                                                                                                                                                                                                                                                                                                                                                                                                                                                                                                                               |

|                  |    |            |                                     |      |      |          |       |                                                                                                                                                                                                                                                                                                                                                                                                                                                                                                                                                                                                                                                                                                                                                                                                                                                                                                                                                                                                                                                                                                                                                                                                                                                                                                                                                                                                                                                                                                                                                                                                                                                                                                                                                                                                                                                                                                                                                                                                                               |
|------------------|----|------------|-------------------------------------|------|------|----------|-------|-------------------------------------------------------------------------------------------------------------------------------------------------------------------------------------------------------------------------------------------------------------------------------------------------------------------------------------------------------------------------------------------------------------------------------------------------------------------------------------------------------------------------------------------------------------------------------------------------------------------------------------------------------------------------------------------------------------------------------------------------------------------------------------------------------------------------------------------------------------------------------------------------------------------------------------------------------------------------------------------------------------------------------------------------------------------------------------------------------------------------------------------------------------------------------------------------------------------------------------------------------------------------------------------------------------------------------------------------------------------------------------------------------------------------------------------------------------------------------------------------------------------------------------------------------------------------------------------------------------------------------------------------------------------------------------------------------------------------------------------------------------------------------------------------------------------------------------------------------------------------------------------------------------------------------------------------------------------------------------------------------------------------------|
|                  |    |            |                                     |      |      |          |       | ,FBXW8-,FGFR3-,FIS1-,FKBP2-,FKBP9-,FLAD1-,FLCN+,FMC1-,FN3KRP-,FSTL3+,G6PC3-,G6PD-,GABARAP-,GAMT-,GANAB-,GCDH-,GLI1+,GLMP-,GORASP1-,GPAT4+,GPR37L1-,GPX4-,GSTK1-,GSTP1-,GTF2H4-,GUK1-,GYS1-,H2BC4-,HDAC4+,HES4--,HES5-,HIGD2A-,HINT2--,HMBS-,HMGCL-,HNRNPL-,HR-,HRAS-,IKZF4+,IMP4-,INPP5K-,INTS3--,IRAK2++,IRF2BPL+,IRS2++,ITI4-,IVD-,JADE2+,JARID2+,JDP2+,JUND+,KCTD5-,KDM4B+,KDM6B+,KLHL21+,LAMTOR1-,LAMTOR4-,LARS2--,LDHD-,LSM7-,LTBP4+,MAPT-AS1+,MCM3-,MECP2+,MED20-,MFHAS1+,MFN2-,MGMT-,MICAL1-,MICAL3+,MMP28--,MPV17-,MPV17L2-,MRM1-,MRPL20-,MRPL24--,MRPL53-,MRPS18B-,MSRB1--,MT3-,MTG2-,MYH3+,NCSTN-,NENF-,NFKBID+,NIT1-,NMRAL1-,NOL3-,NR6A1+,NTHL1-,NUCB1-,NUDT2--,NUP210-,OGFOD2-,OS9-,PARP3-,PARS2-,PC-,PDCD11-,PDE9A-,PER1+,PEX10-,PIM3+,PLK5+,PLPP4+,PMM2-,PNPLA6+,POLR2G-,POLR2L-,PPIF-,PPP1CA-,PPP1R1B-,PPP4C-,PRELID1-,PRKCD--,PSENE--,,PSMB10-,PTPN7-,PTPRU+,PUF60-,RAD9A-,RASA4+,RBM10-,RECQL5-,RERE+,RETSAT-,RFXANK-,RGMA+,RNF167-,RNF181-,RNF5-,ROMO1-,RPN2-,RPS15-,RPS19-,RUBCN+,RUVBL1-,S100A1--,SARDH-,SCARNA13+,SDSL--,SEC13--,SF3A1--,SF3B5-,SH2D3C-,SH3BGR13-,SHISA5-,SKI+,SLC35C2-,SLC44A2--,SMOX+,SMPD1-,SNAPIN-,SNHG12+,SNORA73A+,SNRNP40-,SOX12+,SPRED3-,SRM-,SRRM2+,STARD10+,SUMF1-,SUMF2-,SUOX-,SURF1-,SWI5-,TAB1-,TBC1D10A-,TEX264-,TFPT-,TIMELESS+,TKFC-,TM7SF2--,TMEM258-,TMPRSS5+,TNFSF13-,TPP1-,TRAPPC9-,TRIM47+,TRIM8+,TRPM4-,TRRAP+,TSHZ1+,TSR2-,TST-,TXN2--,UBE2I+,UQCR11-,URB1+,USP4-,VKORC1-,VRK3-,WNT4+,XYLT2-,ZBED6++,ZBTB7C+,ZDHHC11+,ZDHHC4--,ZMIZ1+,ZNF16-,ZNF219+,ZNF358+,ZNF445+,ZNF496-,ZNF500+,ZNF511+,ZNF589+,ZNF750+,ZNF768+,ZNF853+,ZNHIT1-,ZSCAN25-                                                                                                                                                                                                                                                                                                                                                                                                                     |
| <b>turquoise</b> | BP | GO:0006807 | nitrogen compound metabolic process | 1482 | 8098 | 6.78E-06 | 0.012 | AAAS-,AARS2-,ABHD14B-,ACAN+,ACOT8+,ACSS1-,ADAM15-,ADAM8-,ADAMTS13-,ADAMTS2++,ADPGK-,AGPAT1--,AKR7A2-,ALDH4A1-,ALYREF-,ANKRD9+,APH1A-,APLNR+,APOE-,ARHGFEF10L+,ASPHD1-,ATAT1-,ATF5-,ATF6B-,ATG4B+,ATN1+,ATP5MC2-,AUTS2-,B3GALT4-,BCAP31-,BCKDHA-,BOLA1-,BRD1+,BRD2+,BRD4+,BRPF3+,CALR-,CASP9-,CBS+,CBY1-,CCDC88C-,CCS--,CHST6++,CIB1-,CIC+,CINP-,CLEC3B-,CNDP2-,COMT-,COQ9-,CRAT-,CREBBP+,CSNK2B-,CST3-,CSTB-,DCAF11-,DCAKD-,DDX49-,DELE1-,DESI1-,DGCR8+,DHX8-,DIDO1+,DLST-,DOK7+,DUS2-,EDEM2--,EEF2-,EEF2K+,EIF3D-,EIF5A-,ELOB-,FAH-,FANCE+,FBXL12-,FBXO17+,FBXO6-,FBXW8-,FGFR3-,FIS1-,FKBP2-,FKBP9-,FLAD1-,FLCN+,FN3KRP-,FSTL3+,G6PD-,GAMT-,GANAB-,GCDH-,GLI1+,GLMP-,GORASP1-,GPAT4+,GPR37L1-,GPX4-,GSTK1-,GSTP1-,GTF2H4-,GUK1-,H2BC4-,HDAC4+,HES4--,HES5-,HINT2--,HMBS-,HMGCL-,HNRNPL-,HR-,HRAS-,IKZF4+,IMP4-,INPP5K-,INTS3--,IRAK2++,IRF2BPL+,IRS2++,ITI4-,IVD-,JADE2+,JARID2+,JDP2+,JUND+,KCTD5-,KDM4B+,KDM6B+,KLHL21+,LAMTOR1-,LARS2--,LSM7-,LTBP4+,MAPT-AS1+,MCM3-,MECP2+,MED20-,MFHAS1+,MGMT-,MICAL1-,MMP28--,MPV17L2-,MRM1-,MRPL20-,MRPL24--,MRPL53-,MRPS18B-,MSRB1--,MT3-,MTG2-,MYH3+,NCSTN-,NENF-,NFKBID+,NIT1-,NMRAL1-,NOL3-,NR6A1+,NTHL1-,NUCB1-,NUDT2--,NUP210-,OS9-,PARP3-,PARS2-,PC-,PDCD11-,PDE9A-,PER1+,PEX10-,PIM3+,PLK5+,PMM2-,PNPLA6+,POLR2G-,POLR2L-,PPIF-,PPP1CA-,PPP1R1B-,PPP4C-,PRELID1-,PRKCD--,PSENE--,,PSMB10-,PTPN7-,PTPRU+,PUF60-,RAD9A-,RASA4+,RBM10-,RECQL5-,RERE+,RFXANK-,RGMA+,RNF167-,RNF181-,RNF5-,RPN2-,RPS15-,RPS19-,RUVBL1-,S100A1--,SARDH-,SCARNA13+,SDSL--,SEC13--,SF3A1--,SF3B5-,SH2D3C-,SHISA5-,SKI+,SLC35C2-,SLC44A2--,SMOX+,SMPD1-,SNAPIN-,SNHG12+,SNORA73A+,SNRNP40-,SOX12+,SPRED3-,SRM-,SRRM2+,STARD10+,SUMF1-,SUMF2-,SUOX-,SURF1-,SWI5-,TAB1-,TBC1D10A-,TFPT-,TIMELESS+,TMEM258-,TMPRSS5+,TNFSF13-,TPP1-,TRAPPC9-,TRIM47+,TRIM8+,TRPM4-,TRRAP+,TSHZ1+,TSR2-,TST-,TXN2--,UBE2I+,UQCR11-,URB1+,USP4-,VKORC1-,VRK3-,WNT4+,XYLT2-,ZBED6++,ZBTB7C+,ZDHHC11+,ZDHHC4--,ZMIZ1+,ZNF16-,ZNF219+,ZNF358+,ZNF445+,ZNF496-,ZNF500+,ZNF511+,ZNF589+,ZNF750+,ZNF768+,ZNF853+,ZNHIT1-,ZSCAN25- |



|           |    |            |                                     |      |      |          |       |                                                                                                                                                                                                                                                                                                                                                                                                                                                                                                                                                                                                                                                                                                                                                                                                                                                                                                                                                                                                                                                                                                                                                                                                                                                                                                                                                                                                                                                                                                                                                                                                                                                                                                                                                                                                                                                                                                                                                                                                                                                                                                                                                                                      |
|-----------|----|------------|-------------------------------------|------|------|----------|-------|--------------------------------------------------------------------------------------------------------------------------------------------------------------------------------------------------------------------------------------------------------------------------------------------------------------------------------------------------------------------------------------------------------------------------------------------------------------------------------------------------------------------------------------------------------------------------------------------------------------------------------------------------------------------------------------------------------------------------------------------------------------------------------------------------------------------------------------------------------------------------------------------------------------------------------------------------------------------------------------------------------------------------------------------------------------------------------------------------------------------------------------------------------------------------------------------------------------------------------------------------------------------------------------------------------------------------------------------------------------------------------------------------------------------------------------------------------------------------------------------------------------------------------------------------------------------------------------------------------------------------------------------------------------------------------------------------------------------------------------------------------------------------------------------------------------------------------------------------------------------------------------------------------------------------------------------------------------------------------------------------------------------------------------------------------------------------------------------------------------------------------------------------------------------------------------|
| turquoise | BP | GO:0071704 | organic substance metabolic process | 1583 | 8718 | 1.51E-05 | 0.017 | AAAS-,AARS2-,ABHD14B-,ACADS-,ACAN+,ACOT8+,ACSS1-,ADAM15-,ADAM8-,ADAMTS13-,ADAMTS2++,ADCYAP1R1+,ADIPOR1--,ADPGK-,AGPAT1--,AKR7A2-,ALDH4A1-,ALYREF-,ANKRD9+,APH1A-,APLNR+,APOE-,ARAP1+,ARHGEF10L+,ASPHD1-,ATAT1-,ATF5-,ATF6B-,ATG4B+,ATN1+,ATP5MC2-,AUTS2-,B3GALT4-,BCAP31-,BCKDHA-,BOLA1-,BRD1+,BRD2+,BRD4+,BRPF3+,BSG-,CACNA1H-,CALR--,CASP9-,CBS+,CBY1-,CCDC88C-,CCS--,CES2-,CHST6++,CIB1-,CIC+,CINP-,CLEC3B-,CNDP2-,COMT-,COQ9-,CRAT-,CREBBP+,CRYL1-,CSNK2B-,CST3-,CSTB-,CYB5R3-,DCAF11-,DCAKD-,DDX49-,DELE1-,DESI1-,DGCR8+,DHRS7B-,DHX8-,DIDO1+,DLST-,DOK7+,DUS2-,ECH1-,EDEM2--,EEF2-,EEF2K+,EIF3D-,EIF5A-,ELOB-,ETFB--,FAH-,FAM3A-,FANCE+,FBXL12-,FBXO17+,FBXO6-,FBXW8-,FGFR3-,FIS1-,FKBP2-,FKBP9-,FLAD1-,FLCN+,FMC1-,FN3KRP-,FSTL3+,G6PC3-,G6PD-,GAMT-,GANAB-,GCDH-,GLI1+,GLMP-,GORASP1-,GPAT4+,GPR37L1-,GPX4-,GSTK1-,GSTP1-,GTF2H4-,GUK1-,GYS1-,H2BC4-,HDAC4++,HES4--,HES5-,HINT2--,HMBS-,HMGL-,HNRNPL-,HR-,HRAS-,IKZF4+,IMP4-,INPP5K-,INTS3--,IRAK2++,IRF2BPL+,IRS2++,ITI4-,IVD-,JADE2+,JARID2+,JDP2+,JUND+,KCTD5-,KDM4B+,KDM6B+,KLHL21+,LAMTOR1-,LARS2-,LDHD-,LSM7-,LTBP4+,MAPT-AS1+,MCM3-,MECP2+,MED20-,MFHAS1+,MGMT-,MICAL1-,MMP28--,MPV17L2-,MRM1-,MRPL20-,MRPL24--,MRPL53-,MRPS18B-,MSRB1--,MT3-,MTG2-,MYH3+,NCSTN-,NENF-,NFKBID+,NMRAL1-,NOL3-,NR6A1+,NTHL1-,NUCB1-,NUDT2--,NUP210-,OS9-,PARP3-,PARS2-,PC-,PDCD11-,PDE9A-,PER1+,PEX10-,PIM3+,PLK5+,PLPP4+,PMM2-,PNPLA6+,POLR2G-,POLR2L-,PIPF-,PPP1CA-,PPP1R1B-,PPP4C-,PRELID1-,PRKCD--,PSENE1-,PSMB10-,PTPN7-,PTPRU+,PUF60-,RAD9A-,RASA4+,RBM10-,RECQL5-,RERE+,RETSAT-,RFXANK-,RGMA+,RNF167-,RNF181-,RNF5-,RPN2-,RPS15-,RPS19-,RUBCN+,RUVBL1-,S100A1--,SARDH-,SCARNA13+,SDSL--,SEC13--,SF3A1--,SF3B5-,SH2D3C-,SHISA5-,SKI+,SLC35C2-,SLC44A2--,SMOX+,SMPD1-,SNAPIN-,SNHG12+,SNORA73A+,SNRNP40-,SOX12+,SPRED3-,SRM-,SRRM2+,STARD10+,SUMF1-,SUMF2-,SUOX-,SURF1-,SWI5-,TAB1-,TBC1D10A-,TFPT-,TIMELESS+,TKFC-,TM7SF2--,TMEM258-,TMPRSS5+,TNFSF13-,TPP1-,TRAPPC9-,TRIM47+,TRIM8+,TRPM4-,TRRAP+,TSHZ1+,TSR2-,TST-,TXN2-,UBE21+,UQCRC1-,URB1+,USP4-,VKORC1-,VRK3-,WNT4+,XYLT2-,ZBED6++,ZBTB7C+,ZDHHC11+,ZDHHC4--,ZMIZ1+,ZNF16-,ZNF219+,ZNF358+,ZNF445+,ZNF496-,ZNF500+,ZNF511+,ZNF589+,ZNF750+,ZNF768+,ZNF853+,ZNHIT1-,ZSCAN25- |
| turquoise | BP | GO:0006325 | chromatin organization              | 153  | 659  | 1.57E-05 | 0.017 | AUTS2-,BRD1+,BRD2+,BRD4+,BRPF3+,CREBBP+,FLCN+,GPX4-,H2BC18-,H2BC4-,HDAC4++,HR-,JADE2+,JARID2+,JDP2+,KDM4B+,KDM6B+,MECP2+,MT3-,PER1+,PHF13+,PRKCD--,RERE+,RUVBL1-,SKI+,TRRAP+,ZMIZ1+,ZNHIT1-                                                                                                                                                                                                                                                                                                                                                                                                                                                                                                                                                                                                                                                                                                                                                                                                                                                                                                                                                                                                                                                                                                                                                                                                                                                                                                                                                                                                                                                                                                                                                                                                                                                                                                                                                                                                                                                                                                                                                                                          |
| turquoise | BP | GO:0043543 | protein acylation                   | 63   | 222  | 1.65E-05 | 0.017 | ATAT1-,AUTS2-,BRD1+,BRPF3+,CREBBP+,DLST-,FLCN+,HINT2--,JADE2+,MECP2+,PER1+,RUVBL1-,TRRAP+,ZDHHC11+,ZDHHC4--                                                                                                                                                                                                                                                                                                                                                                                                                                                                                                                                                                                                                                                                                                                                                                                                                                                                                                                                                                                                                                                                                                                                                                                                                                                                                                                                                                                                                                                                                                                                                                                                                                                                                                                                                                                                                                                                                                                                                                                                                                                                          |
| turquoise | BP | GO:0043170 | macromolecule metabolic process     | 1375 | 7509 | 2.30E-05 | 0.021 | AAAS-,AARS2-,ABHD14B-,ACAN+,ACOT8+,ADAM15-,ADAM8-,ADAMTS13-,ADAMTS2++,ALYREF-,ANKRD9+,APH1A-,APLNR+,APOE-,ARAP1+,ARHGEF10L+,ASPHD1-,ATAT1-,ATF5-,ATF6B-,ATG4B+,ATN1+,AUTS2-,B3GALT4-,BCAP31-,BOLA1-,BRD1+,BRD2+,BRD4+,BRPF3+,CALR--,CASP9-,CBS+,CBY1-,CCDC88C-,CCS--,CHST6++,CIB1-,CIC+,CINP-,CLEC3B-,CNDP2-,CREBBP+,CSNK2B-,CST3-,CSTB-,DCAF11-,DDX49-,DELE1-,DESI1-,DGCR8+,DHX8-,DIDO1+,DLST-,DOK7+,DUS2-,EDEM2--,EEF2-,EEF2K+,EIF3D-,EIF5A-,ELOB-,FANCE+,FBXL12-,FBXO17+,FBXO6-,FBXW8-,FGFR3-,FIS1-,FKBP2-,FKBP9-,FLCN+,FN3KRP-,FSTL3+,G6PD-,GANAB-,GLI1+,GLMP-,GORASP1-,GPR37L1-,GSTP1-,GTF2H4-,GYS1-,H2BC4-,HDAC4++,HES4--,HES5-,HINT2--,HMBS-,HNRNPL-,HR-,HRAS-,IKZF4+,IMP4-,INPP5K-,INTS3--,IRAK2++,IRF2BPL+,IRS2++,ITI4-,JADE2+,JARID2+,JDP2+,JUND+,KCTD5-,KDM4B+,KDM6B+,KLHL21+,LAMTOR1-,LARS2-,LSM7-,LTBP4+,MAPT-AS1+,MCM3-,MECP2+,MED20-,MFHAS1+,MGMT-,MICAL1-,MMP28--,MPV17L2-,MRM1-,MRPL20-,MRPL24--,MRPL53-,MRPS18B-,MSRB1--,MT3-,MTG2-,MYH3+,NCSTN-,NENF-,NFKBID+,NMRAL1-,NOL3-,NR6A1+,NTHL1-,NUCB1-,NUP210-,OS9-,PARP3-,PARS2-,PC-,PDCD11-,PER1+,PEX10-,PIM3+,PLK5+,PMM2-,POLR2G-,POLR2L-,PIPF-,PPP1CA-,PPP1R1B-,PPP4C-,PRELID1-                                                                                                                                                                                                                                                                                                                                                                                                                                                                                                                                                                                                                                                                                                                                                                                                                                                                                                                                                                                                                                     |

|                  |    |            |                                 |     |     |          |       |                                                                                                                                                                                                                                                                                                                                                                                                                                                                                                                                                                                                                                 |
|------------------|----|------------|---------------------------------|-----|-----|----------|-------|---------------------------------------------------------------------------------------------------------------------------------------------------------------------------------------------------------------------------------------------------------------------------------------------------------------------------------------------------------------------------------------------------------------------------------------------------------------------------------------------------------------------------------------------------------------------------------------------------------------------------------|
|                  |    |            |                                 |     |     |          |       | ,PRKCD--,PSEEN--,PSMB10-,PTPN7-,PTPRU+,PUF60-,RAD9A-,RASA4+,RBM10-,RECQL5-,RERE+,RFXANK-,RGMA+,RNF167-,RNF181-,RNF5-,RPN2-,RPS15-,RPS19-,RUVBL1-,S100A1--,SCARNA13+,SEC13--,SF3A1--,SF3B5-,SH2D3C-,SHISA5-,SKI+,SLC35C2-,SMPD1-,SNAPIN-,SNHG12+,SNORA73A+,SNRNP40-,SOX12+,SPRED3-,SRRM2+,SUMF1-,SUMF2-,SWI5-,TAB1-,TBC1D10A-,TFPT-,TIMELESS+,TMEM258-,TMPRSS5+,TNFSF13-,TPP1-,TRAPPC9-,TRIM47+,TRIM8+,TRPM4-,TRRAP+,TSHZ1+,TSR2-,UBE2I+,URB1+,USP4-,VKORC1-,VRK3-,WNT4+,XYLT2-,ZBED6++,ZBTB7C+,ZDHHC11+,ZDHHC4--,ZMIZ1+,ZNF16-,ZNF219+,ZNF358+,ZNF445+,ZNF496-,ZNF500+,ZNF511+,ZNF589+,ZNF750+,ZNF768+,ZNF853+,ZNHIT1-,ZSCAN25- |
| <b>turquoise</b> | BP | GO:0016569 | covalent chromatin modification | 103 | 419 | 3.71E-05 | 0.030 | AUTS2-,BRD1+,BRD4+,BRPF3+,CREBBP+,FLCN+,HDAC4++,HR-,JADE2+,JARID2+,JDP2+,KDM4B+,KDM6B+,MECP2+,MT3-,PER1+,PRKCD--,RUVBL1-,SKI+,TRRAP+,ZNHIT1-                                                                                                                                                                                                                                                                                                                                                                                                                                                                                    |
| <b>turquoise</b> | MF | GO:0003682 | chromatin binding               | 109 | 450 | 4.08E-05 | 0.030 | ATF5-,AUTS2-,BRD2+,BRD4+,CIC+,CREBBP+,CSNK2B-,GLI1+,HDAC4++,HES5-,HR-,JARID2+,JDP2+,KDM6B+,PER1+,PHF13+,RERE+,TSHZ1+,ZNF750+,ZNHIT1-                                                                                                                                                                                                                                                                                                                                                                                                                                                                                            |
